# Supplementary material for: Centromere-Specific Retrotransposons and Very-Long-Chain Fatty Acid Biosynthesis in the Genome of Yellowhorn (Xanthoceras sorbifolium, Sapindaceae), an Oil-Producing Tree With Significant Drought Resistance
Source: Frontiers journal article supplement (doi:10.3389/fpls.2021.766389), 2021-11-22
Supplement: Data_Sheet_1.zip [file Data_Sheet_1.zip]

## Sheet: S1
Data Files S1 The top 20 most abundant tandem repeats identified from PacBio long reads.
Cluster name	Number of motif	Average length of motif	Numbet of reads	Total length of motif	Sequence of motif
Cluster_410	280317	187	4608	5.24193e+07	AAAAAAATCAACAATTTTCCAAAGGGGTTAGTAAGGGAAATTTGAGCAAAATTAGAAAACTCGTGTATTACACTCAGAAACGCGATTCGACTGAAAACTTTATTATGGAACTGCTAGAAATACTCTATTTTTATCCATGAGGGACATCTAGGGTCATTCCGAGCGCAACGCGCAGTCATTTCGACACCAT
Cluster_389	266414	187	4387	4.98195e+07	TATGAAATACTATAATCCATAAGGGACATCTAGGGTCATTCCGAGCGCAACGCGCAGTCATTCGAGACCATAAAAAAATCAACAATTTTCATAGGGGTTAGTAAGGGAAATTTGAGCAAAATTAGAAAACTCGTGTATTACACTCAGAAACGCGATTCGACTGAAAACCTTGTCATGGAACTGCTAGAAATACTCTATTT
Cluster_403	252596	187	4146	4.72354e+07	GTAAGGGAAATTGAGCAAAATTAGAAAACTCGTGTATTACACTCAGAACGCGATTCACTGAAAACCTATTATGGAACTGCTAGAAATACTCTATTTTACCCATGAGGGACATCTAGGGTCATTCGATCGCAACGCGCAGTCATTCCGACACCATAAAAAAATCAACAATTTTCATAGGGGTTAGTAAGGAAAT
Cluster_411	156315	187	2576	2.92309e+07	GAGTGTAATACACGAGTTTTTTAAATTTTGCTCAAATTTCCCTTACTAACCCCTATGAAAATTGTTGAATTTTTTTATGGTCTCGAAATGACTGCGCGTTGCGATCGGAATGACCCTAGATATCCCTCATGGATAAAATAGAGTATTTCTAGCCGTTCCATAGCAAGGTTTTCAGTCGAATCCCGTTTCT
Cluster_422	145167	187	2372	2.71463e+07	TTCCGAGACCATAAAAAAATCAACAATTTTCATAGGGGTTAGTAAGGGAAATTTGAGCAAAATTAGAAAACTCGTGTATTACACTCAGAAACGCGATTCGACTGAAAACCTCGTTATGGAACTGCTAGAAATACTCTATTTTATCCATGAGGGACATCTAGGGTCATTCCGAGCGCAACTCGCGTAGTCA
Cluster_464	119514	187	1977	2.23492e+07	CATTCCGAGCGCAACGCGCGGTCATTCCGAGACCATAAAAAAATCAACAATTTTCATAGGGGTTAGTAAGGGAAATTTGAGCAAAATTAGAAAACTCGTGTATTACACTCAGAAACGCGATTCGACTGAAAACCTTGTTATGGAACTGCTAGAAATACTCTATTTTATCCATGAGGGACATCTAGGGT
Cluster_147	51738.2	375	1621	19401825	CATTCCGATCCAACGCGCAGTCATTCCGACACCATAAAAAAATCAACAATTTTCATAGGGGTTAGTAAGGGAAATTTGAGCAAAATTAGAAAACTCGTGTATTACACTCAGAAACGCGATTCGACTGAAAACCTTATTATGGAACTGCTAGAAATACTCTATTTTATCCATGAGGGACATCTAGGGTCATTCCGATCGTCATTCCGAACGCGCAGTCATTCCGACACCATAAAAAAATCAACAATTTTCATAGGGGTTAGTAAGGGAAATTTGAGCAAAATTAGAAAACTCGTGTATTACACTCAGAAACGCGATTCGACTGAAAACCTTATTATGGAACTGCTAGAAATACTCTATTTTATCCATGAGGGACATCTAGGGTCATTCCGATCGCAACGG…
Cluster_431	87034.7	187	1422	1.62755e+07	ACACGAGTTTTCTAATTTTGCTCAAATTTCCCTTACTAACCCCTTTGGAAATTGTTGAATTTTTTTATGGTGTCGGAATGACTGCGCGTTGCGATCGGAATGACCCTAGATGTCCCTCATGGATAAAATAGAGTATTTCTAGCAGTTCCATAATAAAGTTTTCAGTCGAATCGCGTTTCTGAGTGTAAT
Cluster_463	85199.8	187	1365	1.59324e+07	GTTCGACTGAAAACCTTGTCATGGAACTGCTAGAAATACTCTATTTTATCCGTGAGGGACATCTAGGGTCATTCCGATTGCAACTCGCAGTCATTCCGAGACCATAAAAAAATCAACAATTTTCATAGGGGTTAGTAAGGGAAATTTGAGCAAAATTAGAAAACTCGTGTATTACACTCAGAAACGCG
Cluster_390	83134.9	187	1382	1.55462e+07	CATCTAGGGTCATCATAGGTGCATCATTCCGATCGCAACGCGCAGTCATTCCGACACCATAAAAAAATCAAAATTTTCATAGGGGTTAGTAAGGAAAATTGAGCAAAATTAGAAACTCGCATAGTACACTCAGAAACGCGATTCGACTGAAAAACTTATTATGGAACTGCTAGAAATACTCTATTTTATCCATGAGGGA
Cluster_406	68147.8	187	1133	1.27436e+07	ATTTTGCTCAAATTTCCCTTACTAACCCCTATGAAAATTGTTGATTTTTTTATGGTCTCGGAATGACTGCGCGATGCGCTCGGAATGACTCTAGATGTCCCTCATGGACAAAATAGTGTATTTCTAGCAGTTCCATGATAAGGTTTTTCAGTCGAATCGCGTTTTCCTGAGTATAATACACGAGTTTTCTA
Cluster_445	58462.2	187	926	1.09324e+07	TTTTCATAGGGGTTAGTAAGGGAAATTTGAGCAAAATTTGAAAACTCGTGTATTACACTCAGAAACGGGATTCGACTGAAAACCTTGCTATGGAACGGCTAGAAATACTCTATTTTTATCCATGAGGGATATCTAGGGTCATTCCGATCGCAACGCGCAGTCATTCCGAGACCATAAAAAAATCAACAA
Cluster_407	54577.8	187	940	1.0206e+07	GAACTGCTAGAAATACTCTATTTTATCCATGACGACATATAGGGTCATTCCGATCGCAACGCGCAGTCATTCCGACACCGCACATAAAAAATCAACAATTTTTCATAGGGGTTAGTAAGGGAAATTTGAGCAAAATTAGAAAACTCGTGTATTACACTCAGAAACGCGATTCGACTGAAAACCTTATTGTG
Cluster_156	19093.4	375	613	7160025	GTTTTCAGTCGAATCGCGTTTCTGAGTGTAATACACGAGTTTTCTAATTTTGCTCAAATTTCCCTTACTAACCCCTTTGGAAATTGTTGATTTTTTTATGGTGTCGGAATAACTGCGCGTTGCGATCGGAATGACCCTAGATGTCCCTCATGGATAAAATAGAGTATTTCTAGCAGTTCCATAATAAAGTTTTCAGTCGAATCGCGTTTCTGAGTGTAATACACGAGTTTTCTAATTTTGCTCAAATTTCCCTTACTAACCCCTTGGGAAATTGTTGATTTTTTTATGGTGTCCGGAATCGACTACTGCGCGTTGCGATCGGAATGACCCTAGATGTCCCTCATGGATAAAATAGAGTATTTCTAGCAGTTCCATAATAAA
Cluster_414	38016.1	187	629	7.10901e+06	CTCGGAATGACCCTAGATGTCCATCATGGACAAAATAGTGTATTTCTAGCAGTTCCATGATAACGTTTCTCAGTAGAATCGCGTTTCTGAGTATAATACACGAGTTTTCTAATTTTGCTCAAATTTCCCTTACTAAACCCTATGAAAATTGTTGATTTCGTTATGGTCTCGGAATGACTCCGAGATGTCC
Cluster_460	36355.6	187	607	6.7985e+06	AAGGTTTTCAGTCGAATCGCGTTTCTGAGTGTAATACACGAGTTTTCTAATTTTGCTCAAATTTCCCTTACTAACCCCTATGAAAATTGTTGATTTTTTTATGGCCTAAGAAATGACCGGGCGTTGTGCTCGGAATGACCCTAGATGTCCCTCATGGATAAAATATACTGTCTCTAGCAGTTCCATAAC
Cluster_154	15053.9	373	494	5.6151e+06	ATTTTCATAGGGGTTAGTAAGGGAAATTTGAGCAAAATTAGAAAACTCGTGTATTACACTCAGAAACGCGATTCGACTGAAAACCTTATTATGGAACTGCTAGAAATACTCTATTTTATCCATGAGGGACATCTAGGGTCATTCCGATCGCAACGCGCAGTCATTCCGACACCATAAAAAAATCAACAATTTTCATAGGGGTTAGTAAGGGAAATTTGAGCAAAATTAGAAAACTCGTGTATTACACTCAGAAACGCGATTCGACTGAAAAACTTATTATGGAACTGCTAGAAATACTCTATTTTATCCATGAGGGACATCTAGGGTCATTCCGATCGCAACGCGCAGTCATTCTCGACACCGCATCATCCATAAAAAATCAACA
Cluster_417	28705	188	461	5396540	TCCGCTCGGAATGAGCCTATATTTCACTCATGGATATAATAGGGTATTTCTAGCTAGTTCCATGACTCGGTTTTCAGTCAGATCGCGTTTTTCATTGAAATATGCGACTTTTCTAATTTTGCTCCGAATTCCCTTACTAACCCCTTTGAGAATTGTTGATTTTTTTGATAGTATGGGAATGACTGCAAGT
Cluster_405	22866.1	187	381	4.27596e+06	GGGTTAAGTAAGGAAAATTGAGCAAAATTAGAAAACTCGTGTATTACACTCAAAAATGCAATTCGACTGAAAAGGTTGTCATGGAACTGCTAGAAATACTCTATTTTATCCATGAGGGACATCTAGGGTCATTCCGAGCGCAACTCGCAGTCATTCCGAGACCATAAATAAAAAATCATCACAATTTTAATA
Cluster_395	18916.8	188	300	3.55636e+06	ATAGTCCTATTATATCCATGAGTGAAATATAGGCTCATTCCGAGCGGAACTTGCAGTCATTCCCACACTATTCAACAATTCTCAAAGGGGTTAGTAAGGGAATTCGGAGCAAAATTAGAAAAGTAGCATATTTCAATGAAAAACGCGATCAGACTGAAAACCGAGTCATGGAACTGCTAGAATACCCTATTATATCC

## Sheet: S2
Data Files S2 The centromeric genes expression profile. The expression values were normalized by ln(TPM+1).
Genes	RS_FB	B_DHX	A0_H1_HX	C9_H1_CX	C9_H1_DX	C9_H1_HX	E2_H1_HX	A0_H1_CH	A0_H1_SK	C9_H1_CH	C9_H1_XH	E2_H1_LXH	JH_H1_HL	JH_H1_SH	A0_H2_XH_BH	A0_H2_XH_HU	A0_H2_XH_QH	C9_H2_BH_LXH	C9_H2_LXH_QH	C9_H2_QH_XH	E2_H2_HU	E2_H2_KL_XH	E2_H2_LXH	A0_H3_LXH_LH	A0_H3_XH_LH	C9_H3_XH_LH	JH_H3_BK	JH_H3_HO	C9_1G	E2_1G	A0_2G	C9_2G	E2_2G	A0_3G	E2_3G	E2_4GP	C9_4GP	A0_5GP	C9_5GP	E2_5GP	A0_4GR	C9_4GR	E2_4GR	A0_5GR	E2_5GR	E2_6GR	A0_Y1	C9_Y1	E2_Y1
XS15G0040300.1	1.70443	1.83974	1.56621	1.73173	1.91572	1.94568	1.74092	0.884556	0.699107	0.969924	0.766171	1.53487	1.23413	1.31829	1.18971	1.2635	0.713727	1.65796	1.33311	0.60308	1.05471	0.561145	1.51423	1.80052	1.11642	0.430307	0.248799	0.616164	0.943916	1.15632	0.806159	1.66842	1.71795	1.81186	1.62479	1.42987	1.32724	1.1422	1.15956	1.24816	1.65585	1.67008	1.29598	1.47313	0.56585	0.204727	2.10785	2.13843	2.53701
XS02G0162700.1	3.30819	3.07448	3.07559	3.00495	2.98031	3.22408	2.83068	2.38821	2.34253	2.17017	1.84594	2.90446	2.44263	2.6845	2.83078	2.40105	2.7153	3.2273	3.13806	2.79029	2.10563	2.43678	2.82234	3.58559	2.73382	2.62563	2.07826	2.48687	2.03373	1.78109	1.65938	3.14152	2.78749	2.70793	2.44911	2.50614	2.73103	2.8279	2.83767	2.72006	2.43418	3.05105	2.73534	2.56571	2.1287	1.9251	3.78452	3.55906	3.29376
XS14G0113700.1	3.12688	3.65587	3.72764	4.02467	3.81117	3.76765	4.62132	3.94885	3.92316	3.65596	3.57291	4.37755	5.40906	4.65824	4.17921	4.16972	3.18187	3.74788	3.65902	3.68755	5.01154	3.28973	4.75392	3.67074	3.46828	3.11436	3.61407	3.9783	3.87229	3.69576	5.02855	3.50211	3.15619	3.5276	3.6697	2.59113	3.99295	2.54025	2.81361	1.98632	2.86463	2.35603	2.15019	0.763336	0.440973	0.0942842	2.48632	2.61327	2.63376
XS13G0220700.1	0	0	0	0	0	0	0	0	0	0	0	0	0	0	0	0	0	0	0	0	0	0	0	0	0	0	0	0	0	0	0	0	0	0	0	0	0	0	0	0	0	0	0	0	0	0	0	0	0
XS05G0166000.1	0.101438	0	0.098676	0	0	0	0	0	0	0	0.0521357	0	0.261717	0	0	0	0.0514045	0.0709672	0	0	0	0.225765	0.105228	0	0	0.131863	0.055388	0.106371	0	0	0.132557	0	0	0	0	0	0	0	0	0.252912	0	0	0	0	0	1.09477	0.0503268	0	0.12551
XS09G0092900.1	2.48305	2.71312	1.5844	2.76266	2.96209	2.63252	1.58694	1.2502	1.35059	2.27152	2.32885	1.04105	2.38296	1.92922	1.4885	1.99754	1.06171	2.15652	1.7718	2.19934	0.630224	0.661341	1.50288	1.28848	1.43396	1.79484	1.45984	1.87911	2.14201	1.40531	2.76512	2.53095	1.5792	2.91445	2.54301	3.46574	2.83247	3.26341	2.93929	1.68079	2.52363	1.87288	2.44573	0.51732	0.310328	0	1.56095	2.22375	1.5704
XS11G0092900.1	3.5389	3.5619	3.12088	3.803	3.82394	3.74682	3.13267	1.96024	1.40089	1.24946	1.00808	2.74386	2.37453	2.1035	1.3087	1.39559	0.877342	3.21182	3.12421	0.992702	1.21794	0.639035	3.60705	2.87008	1.15806	0.864727	0.951773	1.1616	3.4533	3.89118	3.99282	5.56957	5.37449	5.66844	5.31674	4.90574	4.92021	4.31571	4.75506	5.1422	5.43184	5.47449	4.96571	4.27764	4.49206	4.59921	3.74794	4.02854	3.29389
XS10G0121300.1	5.67999	5.67932	5.49787	5.55212	5.50922	5.56134	5.53861	4.61315	4.27924	4.37935	4.11097	5.33148	4.66846	4.73151	4.68824	4.57566	4.4359	5.40324	5.52502	4.04002	4.70798	4.18766	5.29058	5.64366	4.36917	4.21098	4.03437	4.33792	4.06044	3.56923	3.69135	6.19817	6.17573	5.79924	5.87319	5.30473	5.69255	5.21932	5.41375	5.49529	5.39587	6.32336	5.33697	5.90032	6.03807	6.31707	6.10184	5.8776	5.84895
XS15G0057000.1	2.97369	1.79874	1.29768	1.57151	1.86917	2.83808	1.29834	0.184053	0.172329	0	0.0118162	2.40176	0.226396	0.349457	0.0224498	0.142919	0.031687	3.09483	2.70292	0.0769311	0.0772851	0.0260897	2.78852	3.42943	0.129274	0.0728244	0.0439856	0.0629767	0.211476	0.460724	0.779451	4.17297	4.32661	3.16854	3.07929	1.20225	1.00929	0.419298	0.469069	1.02484	0.503913	3.18595	0.852161	0.281255	0.0228538	0	3.52979	3.74852	3.2134
XS05G0164700.1	3.50449	3.4219	3.16393	3.42791	3.43896	3.40141	3.27317	2.49698	2.17675	2.36323	2.1166	2.90891	3.13152	2.9365	2.52112	2.38623	2.27575	2.98233	2.76426	1.93034	2.04091	2.07562	3.3279	3.30456	2.57302	2.03587	2.26986	2.3607	2.18806	2.49842	2.44772	2.87411	2.84044	3.01134	3.3845	2.63069	3.08557	2.72913	2.73866	2.58886	2.98143	2.74893	3.08232	1.41699	1.29987	1.97366	3.12415	3.04768	2.94729
XS05G0166700.1	1.95283	1.74183	1.21861	1.86437	1.82115	1.64376	1.18394	1.01476	0.575155	0.698341	0.700601	1.06493	1.00567	1.15494	0.412934	1.22265	1.28007	0.615585	1.09755	0.778019	0	0.64223	0.616971	1.21803	1.10893	0.357338	0.400244	0.772649	0	0.593485	0	1.08487	1.48267	0.596995	1.41099	1.28875	0	1.94467	1.82925	1.28474	0	0.542552	2.47877	0.249438	0.868767	0	1.80336	2.55201	2.54495
XS10G0121400.1	4.08651	3.76359	3.64891	3.79769	3.84831	3.97361	3.93774	3.60205	3.80291	3.82532	3.80393	4.00434	4.22604	4.0471	3.92123	3.85339	3.83489	4.12136	3.82971	3.79604	3.76854	3.9693	4.16339	4.22925	4.05249	4.00229	3.95287	3.96309	3.97127	4.3493	4.19489	4.35784	4.37443	4.33774	4.26442	4.19001	4.37554	3.97525	4.00485	4.29483	4.15913	4.27601	4.36914	3.09246	2.46029	3.6926	4.15075	3.92592	3.95447
XS12G0210000.1	0	2.58333	2.08053	3.08196	2.06475	2.27422	3.14882	0.308456	0.510957	0.223147	0.352819	2.04798	1.91276	1.37886	0.162558	0.0999554	0	0.242378	0.1429	0.0624933	0	0	1.22411	0.266957	0.17808	0.602308	2.99926	1.7528	0	0	0	0	0	0	0	0	0	0	0	0	0	0	0	0	0	0	0	0	0
XS15G0037400.1	2.9433	3.46059	3.32526	2.59622	2.6956	2.75889	2.30729	1.06637	1.65242	1.91892	1.55598	2.32983	2.73733	3.35529	3.30425	2.86776	2.23444	2.19923	2.10546	1.74166	1.72204	1.05634	2.51075	2.96358	1.82953	0.506245	1.10056	1.80932	0.38715	0	0.501563	2.20571	2.00534	2.25637	1.23655	0.262127	0.726308	0.612269	1.66707	1.34997	2.07228	2.52165	0.912346	2.53239	2.23865	1.67152	3.14271	2.39667	3.55089
XS02G0165100.1	3.95373	3.74503	3.69642	3.73397	3.97106	3.94142	4.09755	3.88454	4.05549	4.01013	3.84299	4.018	4.68854	4.43968	4.32511	4.13332	4.3502	4.22336	4.22263	4.18007	4.39198	4.14201	4.24467	4.45929	4.19286	4.04189	3.95313	4.35154	3.7567	3.71878	3.73023	3.62667	3.60567	3.85356	3.75837	3.59799	3.47091	3.06169	3.39787	3.8704	3.9924	3.42979	3.73407	2.77969	1.52612	1.45361	3.77631	4.08086	4.22156
XS05G0162500.1	0	0	0	0	0	0	0	0	0	0	0	0	0	0	0	0	0	0	0	0	0	0	0	0	0	0	0	0	0	0	0	0	0	0	0	0	0	0	0	0	0	0	0	0	0	0	0	0	0
XS03G0121600.1	3.15051	2.67139	2.51346	2.52609	2.848	2.96787	2.77168	2.47216	2.56842	2.65639	2.66003	3.05033	2.94675	2.89945	2.74277	2.74721	2.73542	3.0284	2.93547	2.66814	2.92165	2.52703	2.98449	3.07185	2.80616	2.63398	2.833	2.92531	2.39736	2.52191	2.50327	2.36729	2.45763	2.6149	2.43889	1.78478	2.07168	2.08302	1.96882	2.03216	2.31577	2.75005	2.40586	1.71876	0.80774	0.22509	2.57654	2.75575	2.75886
XS10G0121800.1	1.89799	2.02631	2.40784	2.78569	1.95958	2.57197	3.70987	1.95941	1.89742	2.09108	2.06447	3.02698	3.24889	2.93428	1.27928	0.990572	1.93055	1.87207	1.87246	2.43552	2.2841	4.26848	2.54698	1.8454	3.83055	4.27918	5.25163	4.28093	1.88181	3.61065	2.20969	0.565471	0.321947	1.06964	0.639294	0.236038	0.551191	0.691656	1.21908	0.775926	0.36617	3.39035	0.285077	4.96447	5.03937	3.6767	0.432563	0.996973	0.516648
XS01G0100100.1	2.18249	2.40243	2.54136	2.8128	2.65339	2.50256	2.99694	2.5235	2.58407	2.33575	2.67629	2.5125	2.57067	2.60618	2.53218	2.85987	2.19149	2.40824	2.3579	2.36119	2.57487	2.11503	2.59484	2.45735	2.40385	2.60074	2.61773	2.40132	2.44444	2.57608	2.45279	2.90176	2.885	2.89089	2.71327	2.63952	2.46507	2.29099	2.20936	2.309	2.85656	3.05915	2.50907	2.12913	2.43953	2.44056	2.50946	2.53313	2.3176
XS04G0093000.1	0.676528	0.094374	0	0.261529	0.138592	0.236623	0.0417694	0	0.0145529	0.0438494	0.0681028	0.200789	0	0	0	0	0	0.313396	0.37078	0.0900838	0	0	0.0207068	0.0569933	0	0.226999	0	0	0	0	0	0.245924	0.0513478	0.223312	0.207469	0	0	0	0	0	0	0.0941085	0	0	0	0	0.657814	1.28744	0.928224
XS12G0199400.1	4.00386	3.92663	3.74713	4.1583	4.28774	4.24713	3.94554	3.59217	3.37193	3.92639	3.65014	4.05965	3.92933	3.80901	4.06747	3.89404	3.58227	4.03223	3.89377	3.25745	3.49565	3.55322	4.04523	4.04991	3.43485	2.99741	3.46534	3.51559	3.56468	4.0163	3.90866	4.54534	4.54261	4.52191	4.26449	4.25215	4.17054	4.11904	4.17265	4.39028	4.46597	4.41173	4.5981	3.01325	2.64346	2.58618	4.21938	4.36116	4.10374
XS10G0115900.1	2.49508	2.63426	2.14364	2.62586	2.80229	2.66287	2.45639	2.30715	2.25982	2.34226	2.32896	2.6109	2.71364	2.8142	2.48709	2.44038	1.9513	2.42246	1.93044	1.80358	2.36325	1.78734	2.69388	2.51643	2.04466	1.64843	1.46235	2.05377	2.42772	2.99448	3.14078	3.42348	3.31347	3.53528	3.33507	3.11039	3.68598	3.02144	2.82516	3.42889	2.97453	3.22541	3.17629	1.96598	2.17026	2.50067	2.43033	2.52731	2.3217
XS09G0085200.1	2.50427	2.59945	3.3012	2.38729	2.67277	2.10047	2.39134	2.18578	1.98275	0.774131	1.10091	1.80725	0.795661	0.836933	0.517505	1.02112	0.394023	1.14839	1.01895	0.405823	1.6082	0.452664	1.05449	1.48921	1.03651	0.920917	0.810386	0.656447	1.02897	0.539257	0	0.0646016	0.164672	0.259914	0.648593	0.165188	0.16942	0.497455	0.0780891	0	1.55521	0.627604	0	0	0	0	2.12655	1.67282	2.7871
XS02G0162800.1	5.37234	5.29582	5.46219	5.33442	5.48276	5.49819	5.19981	5.49092	5.40213	5.28691	5.17327	5.24246	5.08107	5.00622	4.87673	4.85475	4.86607	5.24217	5.11768	4.89111	5.23059	5.007	4.86296	5.00218	4.58307	4.60916	4.83098	4.94628	4.39103	4.5277	4.97889	5.1577	5.19526	5.10506	4.92616	4.69345	4.6991	5.10983	5.20921	5.18392	4.77371	4.97266	4.38935	4.5243	3.83798	4.32185	5.82339	5.55186	5.17132
XS03G0117400.1	2.73279	2.45489	2.09646	2.33845	2.31982	2.47561	2.52113	2.11154	2.22609	2.17964	2.37052	2.5054	2.67373	2.50763	2.39896	2.33318	2.28162	2.38557	2.03466	2.18901	2.104	2.2818	2.38471	2.69908	2.38798	2.11648	2.13459	2.29189	1.98427	2.07215	2.4311	2.12331	2.08885	2.43424	2.29234	2.22725	2.56273	2.22851	2.24655	2.48966	1.85969	2.1178	1.94616	1.17509	0.362	1.44228	2.10593	2.05032	2.24036
XS09G0090300.1	2.70217	2.32699	1.76913	2.12562	2.35183	2.58856	2.17938	0.484537	0.316327	0.41552	0.194669	2.0602	1.93129	1.4178	0.752588	0.925874	0.218536	2.61111	2.28864	0.200784	0.232665	0.118263	2.44317	2.62547	0.539544	0.237379	0.370957	0.322928	1.58328	1.21754	1.43476	3.74529	2.92303	3.78032	4.17783	2.76903	3.36924	1.69113	2.1734	1.61081	1.46754	2.99342	2.43824	2.28617	1.11421	0.179974	2.72803	2.93933	2.64064
XS10G0121700.1	0.957731	0.485116	0.672348	0.692896	0.835564	0.790719	1.08994	0.139641	0.340826	0.230123	0.0648525	0.858618	1.18142	0.544109	0.7285	0.199258	0.449188	0.694961	0.481211	0.252031	0.224395	0.706685	0.996274	1.23469	0.802655	0.452011	0.817341	0.610001	0.259847	0.238848	0.253832	0.510137	0.840311	0.740936	0.768408	0.566286	0.0161204	0.403006	0	0.418425	1.30126	0.610421	0.826529	1.21032	0.849911	0	0.680116	0.564676	0.555708
XS08G0091100.1	2.90548	3.21872	3.17792	3.49542	3.54303	3.44351	2.87496	2.93634	3.24995	3.68595	3.31047	3.64805	0.767448	1.6806	3.5718	3.78475	2.9599	3.25365	3.16168	2.79917	3.05069	2.4177	3.65843	3.02082	2.90732	1.98926	0.138665	0.74772	1.94655	0.77442	0.123224	1.57974	1.05041	0.0646476	1.70829	1.36321	0.949868	1.80212	1.78816	1.78523	0	0.470029	0	0.540392	0.126755	0.214001	3.20993	3.76275	3.74491
XS12G0211700.1	4.27923	4.47415	4.5645	4.50328	4.74186	4.42487	4.49419	4.61592	4.26914	4.52145	4.00648	4.40776	4.98485	4.87185	4.64546	4.45415	4.9009	4.66181	4.69497	4.75558	4.42955	4.79246	4.95267	4.80571	5.01379	4.60358	4.17232	4.67152	5.09795	5.00613	4.64614	3.60905	3.84497	3.41374	4.22629	4.56568	4.12675	4.60463	4.16322	4.58725	3.32576	3.8572	4.70155	2.17491	3.83727	4.08884	5.08949	4.66312	4.96406
XS09G0084100.1	0	0	0	0	0	0	0	0	0	0	0.0625813	0.0976846	0.249151	0.12112	0.117667	0.35391	0.229296	0.0437696	0.121262	0.172387	0	0.172505	0	0	0.26286	0.183062	0.0955295	0.0987935	0	0	0	0	0	0	0	0	0.150398	0	0	0	0	0	0	0	0	0	0	0	0
XS09G0084300.1	4.33298	4.6706	4.08557	4.70533	4.90714	4.73339	4.40271	3.70346	3.21836	3.82232	3.62845	4.3765	4.16798	3.93337	3.64313	3.6998	3.48214	4.55452	4.20865	3.3594	3.3683	3.35064	4.22868	4.59181	3.71145	3.52489	2.84022	3.23324	3.21438	2.75593	2.56472	3.295	3.15856	3.61694	3.45154	2.89572	2.95851	2.91858	2.90965	2.63162	3.38855	3.10595	3.05828	2.2798	1.80533	1.4401	4.54817	4.98395	5.17423
XS01G0098900.1	1.51645	1.71681	1.54778	2.37309	1.58452	1.90252	2.06437	1.27244	1.56601	0.883589	1.41734	1.78898	2.06917	1.7629	1.09635	1.86446	0.141895	1.2982	1.15235	0.175368	1.20653	0.194951	1.29612	2.17221	0.528472	0.0874375	1.30986	1.46739	1.0259	1.75737	1.67759	1.41212	1.54873	2.08819	2.13189	2.49414	2.27685	1.38222	1.60977	1.08984	0.0407138	0.430123	1.65428	0	0	0	1.21622	1.56687	2.03893
XS14G0113900.1	3.10551	2.97	2.96825	3.24761	3.135	3.0698	3.44039	3.19184	3.16932	3.16066	3.30977	3.30892	3.6476	3.413	3.31988	3.35512	3.32213	3.18924	3.18107	3.3264	3.28298	2.98822	3.09304	3.23587	3.40949	3.14053	3.4989	3.45615	2.89715	2.64739	3.029	2.43285	2.6952	2.82469	3.03866	3.07696	2.97883	2.68838	2.86079	2.98304	2.70205	2.78605	2.48156	1.18565	1.04205	1.50579	2.38569	2.74509	2.77093
XS02G0168900.1	1.15726	0.96357	1.03764	0.636527	1.01615	1.41371	0.759012	0	0.250092	0.270419	0.449443	0.882818	0.550948	0.271931	0.675913	0.323442	0.267736	1.52446	1.37937	0.0541769	0.515362	0.423762	1.3462	1.53668	0.270225	0	0.145786	0.148651	0	0	0	1.81891	2.30332	1.78253	1.75876	1.16834	1.18638	0.650503	0	1.3379	0	1.52521	1.26591	0	0	0	2.09472	1.79767	1.45183
XS09G0092700.1	0	0	0	0	0	0	0	0	0	0	0	0	0	0	0	0	0	0	0	0	0	0	0	0	0	0	0.0617525	0	0	0	0	0	0	0	0	0	0	0	0	0	0	0	0	0	0	0	0	0	0
XS06G0192100.1	0	0	0	0	0	0	0	0	0	0	0	0	0	0	0	0	0	0	0	0	0	0	0	0	0	0	0	0	0	0	0	0	0	0	0	0	0	0	0	0	0	0	0	0	0	0	0	0	0
XS12G0209400.1	2.60144	2.32581	2.0021	2.50894	2.64296	2.63357	2.74487	1.93991	2.10359	1.98651	1.99612	2.76228	2.62065	2.40963	2.17634	2.15084	1.94152	2.46653	2.1617	1.91598	2.33712	2.41112	2.59813	2.60719	2.19587	2.08356	2.04668	2.10883	2.3341	2.81591	2.54888	3.0435	3.07465	3.23535	3.24484	2.48685	2.9794	1.96803	2.33336	2.73213	2.29016	2.74891	2.44967	1.39057	0.91135	1.82922	2.49657	2.83052	2.84988
XS01G0091100.1	0.693927	2.03601	2.01843	3.0807	2.59168	2.23686	3.01599	0.496321	0.366017	0.516163	0.626324	2.02382	3.27529	2.23731	0.501866	0.878716	0.435548	0.509253	0.461576	0.640297	0.194699	0.458443	0.622286	0.519462	0.935882	0.972727	3.79301	2.5905	0.341774	0.364087	0	0.00513479	0.210493	0	0	0	0.0843706	0.0139009	0	0	0	0	0	0	0	0	0.0730959	0.145801	0.0297957
XS10G0116000.1	2.4273	2.37327	2.1766	2.5588	2.40399	2.42198	2.41979	2.15203	2.01364	1.99021	2.21266	2.24188	2.62436	2.82669	2.25917	2.53316	1.88507	2.24216	2.10672	1.66156	2.10573	1.78864	2.6538	2.40169	1.892	1.63815	1.57389	2.07205	2.19549	2.47141	2.78926	2.91683	3.16183	3.06055	3.14887	2.66762	3.12871	2.58219	2.57444	2.98442	2.30618	2.40628	2.97634	1.88934	2.04521	1.84482	2.36592	2.28702	2.09407
XS01G0100500.1	2.79883	3.36682	3.21546	3.64661	3.78146	3.43685	3.1921	2.9845	1.91508	3.29311	1.91072	3.21186	2.52022	2.68245	2.0771	2.79359	1.77167	3.32058	2.3044	1.79056	1.16436	2.26518	2.82514	2.5907	3.24008	1.63038	0.470873	0.803329	1.05079	0.460237	0	0.661699	0.604665	1.07808	0.478336	0.564803	0.100835	0.619606	0.677355	0.920946	1.34224	0.600786	0.185441	0.226086	0	0.174945	3.49253	3.78962	4.39952
XS12G0199900.1	3.11098	2.88893	2.07414	3.20343	3.2967	3.09386	3.16456	1.96304	2.06919	2.62722	2.55691	3.37786	2.59164	2.52215	2.53953	2.43689	2.21116	3.11083	3.12798	2.65419	3.19363	3.0565	2.44006	2.69543	2.45373	2.8166	2.20068	2.39848	2.68081	2.66693	1.96438	3.08801	3.24187	2.48995	2.68205	2.61451	2.79634	2.48264	2.48881	2.73364	2.3642	2.83584	2.62761	1.88291	1.26545	1.61491	2.18343	2.90113	3.32221
XS10G0120000.1	3.5541	4.0041	3.27196	3.79782	3.80819	3.8856	3.34928	2.34838	2.31439	1.99791	2.15974	2.84853	2.75683	2.6472	2.123	2.33772	1.35664	3.39631	3.26907	1.21432	1.98649	0.962452	2.88192	3.6541	2.06822	1.65061	1.37712	1.33854	1.24814	1.10675	1.2413	2.65493	2.70983	3.02996	2.40837	2.31983	2.18802	0.470392	1.00618	1.55083	2.7515	3.05511	1.79281	1.81994	1.9599	1.02442	3.72448	4.17558	3.76457
XS14G0113400.1	3.20169	2.95777	2.51267	2.65065	2.71658	3.0828	2.42754	1.35441	1.86235	2.91281	2.1781	2.97966	3.52409	3.45653	3.68986	2.8445	4.01489	3.86512	3.85075	4.01495	2.9767	3.95127	3.81253	4.02018	3.68915	3.37315	4.04871	4.19927	4.07419	2.90334	3.72853	2.84933	3.31986	2.70233	2.52677	1.55085	1.51081	1.08556	1.70618	2.5403	2.77528	3.15817	1.53913	2.43016	1.27407	0.334836	4.14157	3.95102	4.29546
XS12G0207000.1	0	0	0	0	0	0	0	0	0	0	0	0	0	0	0	0	0	0	0	0	0	0	0	0	0	0	0	0	0	0	0	0	0	0	0	0	0	0	0	0	0	0	0	0	0	0	0	0	0
XS08G0090600.1	2.34159	2.21961	2.62666	2.50164	2.47107	2.81058	2.64497	2.25562	2.12195	2.25194	1.84262	2.41171	3.17972	2.74161	2.23649	2.36345	1.59894	2.6519	2.46472	1.72701	1.81801	1.94531	2.66145	2.81739	2.61792	1.64778	1.9487	2.32223	2.28852	2.94713	2.99046	2.83942	2.85265	2.90069	3.30988	3.44577	3.69586	3.9823	4.09815	3.85778	2.57018	3.18227	4.48962	0.901382	0.585882	1.64903	2.44417	2.76851	2.77489
XS06G0193500.1	2.1866	2.09947	2.33995	2.29962	2.25097	2.2856	2.48405	1.98902	1.69923	1.63418	1.49143	2.46499	2.18704	2.05783	2.28408	2.15316	1.92349	2.32684	2.0916	1.60765	2.29155	1.95464	2.21236	2.80813	2.23052	1.5627	1.48364	1.89285	2.1993	2.5569	1.86017	2.62972	2.76633	2.91714	2.67292	2.59788	2.75387	2.10872	2.38616	2.57491	2.7057	2.71847	2.75459	1.70092	1.44384	1.78097	2.51732	2.3157	2.64043
XS03G0119300.1	4.82289	5.34873	5.46813	5.31458	4.98483	4.98521	5.0759	5.62891	5.52353	5.00653	5.08508	4.9247	4.82432	5.05736	4.94629	4.93969	5.06719	4.74732	4.89936	5.01715	5.07499	4.87404	4.49174	4.57518	4.79541	4.9542	5.08902	5.1107	3.68871	3.07129	3.929	3.91374	3.52604	3.56198	3.42591	3.56698	3.53336	3.97962	4.0885	3.52813	3.18089	3.37982	2.4765	2.66734	2.24151	1.28446	4.90911	4.52674	4.38215
XS05G0163500.1	3.09608	2.6294	2.67272	2.7254	2.87065	3.02744	2.68949	2.11145	2.00819	2.07456	1.70245	2.5978	2.12228	2.36158	2.49748	2.16351	2.05457	2.94725	2.78885	1.8524	2.31163	2.18847	2.74678	3.28502	2.44295	2.2447	1.42408	2.08075	1.36326	0.943838	0.637746	2.90633	2.5785	2.64223	2.64888	2.00377	2.56331	1.85834	2.30209	2.40907	2.39694	2.31082	1.88072	1.48458	1.30047	1.41126	3.39424	3.21661	3.2051
XS12G0197700.1	1.42031	1.78728	0	1.9158	2.13677	1.8121	0	0	0	1.78189	1.7318	0	0	0	0	0	0	1.37076	1.41053	1.67418	0	0	1.48866	0	0	1.77194	0	0	0.906586	0	0	1.20774	0	0	0.515488	0	0.787984	0.434382	0.595893	0	0	0.599345	0	0	0	0	0	1.53344	0
XS05G0172300.1	2.73604	2.64159	2.37935	2.79535	2.6105	2.68982	3.01986	2.4869	2.4658	2.30967	2.12709	2.82073	2.49337	2.55384	2.50941	2.27061	2.10824	2.55743	2.40035	2.10564	2.7275	2.4695	2.36133	2.73996	2.27732	2.31413	2.16862	2.39205	1.27647	1.44961	1.47403	2.12642	2.27511	2.25124	1.97137	2.07623	1.78292	1.67368	1.73766	1.66932	1.83974	2.24739	1.82936	1.66728	1.5718	1.35124	2.8476	2.67173	2.67556
XS09G0092400.1	2.08362	1.87135	1.52976	1.77128	2.11409	2.24628	1.96339	0.558013	0.551398	0.604021	0.550665	1.86978	1.49084	1.27317	1.11532	0.791126	0.401158	2.0003	1.5965	0.307813	0.748634	0.206826	2.02026	2.34418	0.974483	0.581173	0.449073	0.397057	0.813581	1.00776	1.01894	2.64921	2.58137	3.16522	2.71416	2.52962	2.57679	1.58833	1.9807	2.24854	2.81207	2.84547	2.10952	2.53224	2.32751	1.41094	2.32646	2.33164	2.31051
XS15G0057900.1	3.75421	3.53371	3.42714	3.47992	3.67948	3.72556	3.66503	2.91726	3.05988	2.97184	2.95752	3.65	3.6168	3.4685	3.21008	3.15582	2.95934	3.67108	3.38187	2.77244	3.18643	3.13312	3.83869	3.87815	3.19386	2.81264	3.11849	3.2148	3.6602	3.91988	3.78391	4.27761	4.30847	4.27828	4.23322	3.79733	3.94614	3.74147	3.74741	3.99011	3.93241	3.92814	3.75766	3.75764	3.04659	2.97532	3.81889	3.86118	3.82561
XS05G0161400.1	0	0	0	0	0	0	0	0	0	0	0	0	0	0	0	0	0	0	0	0	0	0	0	0	0	0	0	0	0	0	0	0	0	0	0	0	0	0	0	0	0	0	0	0	0	0	0	0	0
XS09G0089100.1	3.10244	3.3735	3.13647	3.65512	3.78603	3.6632	3.81096	3.17178	2.97717	3.77936	3.47635	3.87757	4.28418	4.24065	4.16555	4.00244	4.04603	3.84491	3.94726	3.88318	4.12024	4.09769	4.21698	4.03725	4.15142	3.74437	3.88335	4.18264	4.5267	4.62647	4.61157	4.3004	4.16259	4.66445	4.59584	4.47744	4.35289	4.45504	4.34182	4.13422	4.47541	4.47912	3.86628	3.84166	4.08138	4.43233	2.65027	3.06512	3.27003
XS12G0209900.1	2.95132	2.87189	2.77547	3.1296	3.24161	3.01326	3.38986	3.09555	3.02113	3.30377	3.46346	3.32686	3.02723	3.19095	3.43394	3.48654	2.97688	3.30208	3.15963	3.39021	3.29477	3.6418	2.95663	3.30393	3.42871	3.86742	3.07913	3.11754	3.06372	2.74778	2.33769	2.69191	2.8268	2.72141	2.71735	2.89424	2.75181	2.46468	2.18527	2.36202	2.71349	2.45636	2.3331	1.21366	1.1959	0.920751	2.87151	3.07422	3.06066
XS03G0120900.1	4.17149	4.00236	4.01729	4.08137	4.27137	4.27283	3.8346	4.32076	4.29556	4.7284	4.64795	3.98811	4.59279	4.22179	4.4857	4.33843	4.92206	4.68947	4.69695	5.16637	4.06119	4.8334	4.72422	4.20588	4.64731	4.54189	4.71684	4.71809	5.17444	4.94945	5.41568	4.11077	4.03741	3.9936	4.10822	4.22072	4.17183	4.50432	4.42676	4.92621	3.93837	4.04969	4.19888	2.41803	1.26315	1.72771	4.14621	4.47818	4.21225
XS15G0042800.1	3.28517	3.60449	3.12671	3.29291	3.42215	3.23879	3.1685	2.28136	2.43485	2.56818	1.91425	3.23794	2.21763	2.8041	3.62635	3.36976	2.65663	3.08422	2.90142	2.21188	2.9951	2.44372	2.85974	3.53443	2.80919	1.93542	0.975319	1.83272	0.781841	0.518543	0.342742	2.14844	2.64986	2.10955	1.9786	1.45497	0.648292	0.944918	1.14364	1.24621	1.70364	2.53584	0.711244	1.11758	0.677785	0	3.81907	3.73202	4.14106
XS15G0038600.1	1.86527	1.79056	1.35255	1.68035	1.64356	1.84187	1.93376	0.685854	0.312384	0.574013	0.451894	1.64588	1.89335	1.72834	1.20497	0.701158	0.551755	1.96383	1.85366	0.311263	0.976637	0.779896	1.93905	2.36399	1.05838	0.81166	0.629774	0.979565	0.435151	0.887101	0.683713	2.03437	2.50241	1.92147	2.64449	2.17883	1.77764	0.559666	1.14178	1.68666	1.61185	2.29092	1.71329	1.20312	1.71972	2.30597	1.94972	2.13162	2.51503
XS01G0098400.1	3.15567	3.32567	3.26159	3.45473	3.59456	3.58925	3.48603	3.56167	3.42681	3.6398	3.30779	3.66339	2.95271	3.30906	3.38749	3.34965	3.24557	3.42564	3.03721	2.98405	3.12535	2.80262	2.92394	3.20737	3.44912	2.64239	1.71187	2.36513	2.11061	2.01705	1.58243	1.98224	1.91047	1.79689	1.67869	1.49742	1.34056	1.27502	1.60061	1.64507	1.67231	2.96626	1.5024	2.53321	2.53826	0.821813	3.27565	3.36196	3.88248
XS12G0209000.1	3.06464	2.80932	2.42778	3.19766	3.33292	3.13013	3.34304	2.10228	1.81138	2.77051	2.69714	3.51267	3.17364	3.07213	2.73472	2.91821	2.24413	3.01094	2.57878	1.77575	2.80706	2.34854	2.98799	2.97922	2.63183	1.9543	2.0986	2.50846	2.85161	3.54038	3.19437	3.54107	3.60207	3.49054	3.52627	3.30964	3.81182	3.53783	3.15631	3.57416	2.98987	3.306	3.83309	2.10638	2.27846	3.85237	3.00041	3.31799	3.60948
XS05G0166400.1	2.57874	2.43297	2.48558	2.69243	2.81759	2.6816	2.37482	1.93834	1.42835	0.940136	1.41894	2.62864	2.51419	2.59509	1.66582	1.44493	0.86296	2.59686	2.46717	1.38654	1.67729	0.98545	2.77954	2.9136	0.977944	1.18318	2.68437	2.48409	2.09157	3.05335	2.96894	2.99587	3.24502	3.02444	3.5761	2.78973	2.56922	2.87085	2.97623	2.97681	0	3.21995	2.68984	2.49457	1.49069	1.28316	3.34336	3.27404	3.47584
XS04G0085300.1	2.80411	2.46898	2.4303	2.57477	2.67619	2.698	2.79245	2.31398	2.55009	2.55878	2.40859	2.8254	3.09861	2.9672	2.84114	2.70556	2.60635	2.60353	2.20915	2.3851	2.56149	2.64256	2.83312	2.73455	2.88206	2.41934	2.7316	2.72665	2.3634	2.6786	2.67815	2.26886	2.2894	2.34178	2.5053	2.23827	2.66528	2.43179	2.21515	2.77618	2.08837	2.46124	2.55649	1.61587	1.03964	2.22952	2.75797	2.63371	2.79542
XS12G0200100.1	2.21994	1.98409	1.34546	2.16378	2.15718	2.4242	1.73751	1.63059	0.666992	2.02828	0.935912	2.8674	1.28604	1.22087	1.7216	1.11037	0.836141	2.978	2.85217	0.448243	0.988123	0.891636	2.8583	3.04284	0.858735	0.479235	0.710737	0.748054	3.06537	3.45817	3.5585	4.74139	4.40649	4.73262	5.25919	3.75623	5.28614	2.69647	3.43282	2.23521	0.721458	3.605	2.71741	2.72546	1.72183	0.177873	2.31982	3.16571	2.73109
XS06G0194300.1	3.88065	3.55312	3.62407	3.43931	3.6578	3.65349	3.77742	4.02734	4.11096	4.00644	4.09349	4.20221	4.11677	4.2238	4.24094	4.03749	4.34638	4.13812	4.21581	4.4721	4.16194	4.41438	4.16604	4.16865	4.42925	4.29521	4.25436	4.49092	4.09416	4.09565	4.04036	3.29687	3.4673	3.46528	3.41414	3.677	3.46423	3.46675	3.72801	3.5889	3.40067	3.32722	3.61343	3.11153	2.3524	2.38496	3.17982	3.44488	3.56447
XS12G0199500.1	0.104998	0.404067	0.375008	0.878917	0.366672	0.663266	0.865168	0.597273	0.100502	0.526382	0.26302	0.666837	0.733622	0.928079	0.723014	0.810175	0.247851	0.821529	0.596717	0.465414	0.409209	0.924449	0.727518	1.10219	0.661858	0.297356	0.508992	0.582306	0.36894	0.483612	0.718372	1.2845	1.24391	1.87801	2.15756	1.27212	1.42377	0.37182	1.10048	1.13907	0	0	0.410238	0.115401	0	0	0.050894	0.319553	0.659912
XS10G0120400.1	4.33763	4.33752	4.5616	4.37735	4.28466	4.41584	4.36367	4.90123	4.85889	4.75427	4.93451	4.44489	4.5104	4.58492	4.43748	4.37623	4.42755	4.32813	4.40537	4.51783	4.27791	4.31723	4.54899	4.2814	4.32228	4.20836	4.38242	4.57372	4.42741	4.4835	4.61286	4.47955	4.35063	4.31262	4.35356	4.36029	4.39694	4.45905	4.66504	4.52994	4.10578	4.40309	4.10755	4.41672	4.96868	3.79989	4.44601	4.30871	4.21223
XS11G0097600.1	1.70637	2.48571	2.00457	2.78149	2.19954	2.44946	3.08616	2.30291	2.65372	1.77702	3.24425	2.48618	2.48038	2.07341	2.65492	2.99929	1.39623	2.21215	1.91463	3.31772	1.19875	2.91506	2.76721	2.41919	3.04329	4.36796	4.3394	3.60563	1.09893	1.71424	0.973051	1.75419	1.94726	1.68459	1.42479	1.2098	0.305064	0.125165	0.407016	1.28485	1.36285	2.09573	1.3133	0.426977	0.636224	0.0248702	1.65723	2.32116	1.74383
XS12G0200600.1	3.06185	3.09257	3.04304	2.87624	2.96646	3.31227	3.18612	2.53248	2.74981	2.3998	2.50958	2.7828	2.9991	2.97003	2.65523	2.69293	2.54477	3.07773	2.98398	2.38767	2.69836	2.50185	3.02966	3.2025	2.72722	2.56523	2.80656	2.8869	2.42985	2.65835	2.62628	2.99487	2.95812	3.03953	3.01455	2.7136	2.78567	2.32797	2.50303	2.309	2.89241	2.91587	2.40128	1.97498	0.943784	1.31181	3.14231	3.41474	3.22082
XS02G0165200.1	0	0	0	0	0	0	0	0	0	0	0	0	0.0411205	0	0	0	0	0	0	0	0	0	0	0	0	0	0	0	0	0	0	0	0	0	0	0	0	0	0	0	0	0	0	0	0	0	0	0	0
XS03G0118300.1	0.827711	2.07775	1.64799	2.42309	2.67764	2.11128	2.04349	0.411353	0.361126	0	0.0990018	0.138876	2.08056	1.22458	0.138768	0.205671	0.0974542	0.126792	0.0402282	0	0	0	0.442363	0.467653	0	0.0410869	1.1925	0.65807	0.732751	0.652638	0.496351	0.761736	0.846762	0.905013	1.29646	0.862354	1.02836	1.22999	0.868668	0.24351	0	6.2579	1.04565	5.67236	6.96644	7.27128	0.157491	0.198198	0
XS03G0123000.1	0	0	0	0	0	0	0	0	0	0	0	0	0	0	0	0	0	0	0	0	0	0	0	0	0	0	0	0	0	0	0	0	0	0	0	0	0	0	0	0	0	0	0	0	0	0	0	0	0
XS04G0085400.1	3.15367	2.92973	3.14004	3.27443	3.15448	2.98216	3.13598	2.98422	3.07347	3.11492	2.83474	3.12283	3.65785	3.56344	3.22476	3.35826	3.17072	3.0946	3.12346	2.8536	3.01217	3.15951	4.02068	3.12819	3.19438	2.95154	3.70057	3.35436	4.40099	4.52592	4.55899	4.57618	4.3807	4.30371	4.34858	4.02118	4.51954	4.46466	4.21959	4.5488	4.37961	4.59567	4.67237	3.54917	3.08838	3.78854	3.31741	3.0232	3.13134
XS06G0193800.1	3.4984	2.68506	2.09853	2.80465	3.17368	3.4617	2.95429	1.9895	1.76009	2.39808	2.19443	3.53645	2.95177	3.03468	2.80263	2.66414	2.21582	4.07483	3.43348	2.10618	2.20892	2.41758	3.7665	4.07831	2.24093	1.75902	1.66037	2.28734	2.35165	2.4648	2.79794	4.0611	4.23061	3.88132	4.4888	4.05882	4.01625	3.30737	3.09652	3.53621	2.34619	2.50839	3.0321	1.67687	0.670062	0.230327	3.03641	3.84296	3.95231
XS05G0165400.1	1.9742	1.17252	0.894848	0.354615	1.11119	1.27771	0.446062	0.542211	0.413099	0.257304	0.16618	1.54402	1.6112	0.987721	0.418756	0.265692	1.11941	1.79965	1.5772	1.08869	0	0.960086	2.09131	1.8971	0.880263	1.06547	1.80785	1.28649	2.0367	1.99224	2.64475	2.06696	1.53326	2.04632	2.23733	1.47521	2.54655	2.47477	2.40632	1.99793	0.0684798	1.51721	0.84659	1.0349	0.361799	0.27883	2.58385	2.905	2.41802
XS09G0084400.1	2.65716	1.93344	1.09939	1.45029	1.94683	2.79197	1.26158	0.419193	0.454062	0.481127	0.673389	2.4052	0.885985	1.2211	0.407385	0.364173	0.253047	2.75561	2.6223	0.457636	0.215821	0.454538	2.75418	3.04053	0.632306	0.368071	0.236574	0.531199	0.589051	0.494563	0.996053	3.67721	3.50064	2.68496	2.33148	0.81956	0.550123	0.214936	0.601858	0.678357	0.874379	2.28117	0.884759	1.56367	0.995876	0.306842	2.81195	3.72184	2.968
XS06G0190600.1	0	0	0	0	0	0	0.0660021	0	0	0	0.920413	0.222876	0	0	0	0.0885165	0	0.409629	0.353189	1.11512	0	0.714395	0.561453	0.263105	0	1.73256	0.0928842	0.572158	0.449298	0.318987	0	0	0	0	0	0	0	0	0	0	0	0	0	0	0	0	0	0	0
XS03G0118400.1	4.18126	2.50482	2.08173	1.9087	2.30771	2.94884	1.57303	0.645477	0.523292	0.191382	0.847819	2.45943	0.909516	0.927397	0.779467	1.27198	0.116694	3.05887	2.85808	0.0612378	0.302645	0	3.03297	3.38041	0.677341	0.207415	0.121028	0.25059	0.557976	0.481078	0.132673	3.85794	3.40151	3.78013	3.18668	1.48215	1.58393	1.02968	1.75588	0.942325	1.86569	2.969	0.387538	0.0779171	0.0638336	0	3.66178	3.38011	3.36395
XS15G0039100.1	6.08488	6.00013	5.68674	5.6538	5.77672	5.84321	5.52297	5.11119	4.83557	4.78305	4.52752	5.25363	4.99264	4.90114	4.79604	4.76999	4.79631	5.49679	5.63026	4.31796	4.68874	4.37374	5.43308	5.45736	4.32769	4.23731	4.56103	4.68138	4.94748	4.81264	5.27194	6.7028	6.69056	6.63194	6.28429	5.72918	6.08423	5.62143	5.94247	5.95196	6.27321	6.75633	5.85189	6.87323	6.29026	5.71404	6.55394	6.11986	5.82384
XS01G0099900.1	3.09277	2.89752	2.57382	3.05033	3.13037	3.01427	3.0806	2.18383	1.90001	2.26331	2.09031	3.11949	3.25951	2.83263	2.48501	2.50866	2.54084	2.92204	2.80574	2.02771	2.65031	2.41753	2.95816	3.0064	2.62869	2.18795	2.62439	2.53859	2.82385	2.89627	2.69666	2.85948	3.16154	2.85552	2.64414	2.12221	2.6096	2.29732	2.04372	2.30456	2.45173	2.56253	2.42504	1.2938	1.76654	2.26083	3.17674	3.38467	3.29436
XS03G0125500.1	2.49756	3.15321	3.00752	3.32775	2.9499	3.05113	3.64676	3.58226	3.8232	4.55828	4.60317	4.09821	2.62184	2.92211	3.86834	3.67239	3.12811	3.05703	2.98579	3.062	3.02117	3.06214	3.28654	2.8915	2.74811	2.47131	2.06128	2.86138	2.09711	2.64059	2.67394	2.40849	2.80422	2.83272	2.7662	2.51172	2.40609	2.28407	2.46121	2.59568	3.26623	2.83434	2.31883	1.85454	1.6079	2.30938	2.38085	2.64255	3.09728
XS02G0169100.1	0.142926	0.0214562	0.121743	0.43742	0.519256	0.176264	0.130883	0	0.0809657	0.382224	0.138778	0.141189	0.677921	0.531274	0.0993731	0.224927	0	0.0437425	0	0	0.220652	0	0.600485	0	0	0	0.13388	0.0673745	0.066907	0	0	0	0	0.234644	0.827979	0	0	0	0	0	0	0	0	0.256932	0.554326	0	0	0.0342095	0.133033
XS09G0093300.1	3.44167	3.39178	3.75569	3.47895	3.43546	3.53723	3.76159	3.67608	3.73343	3.39565	3.47867	3.63205	4.11093	3.95559	3.52638	3.78332	3.33889	3.42141	3.37802	3.16338	3.69467	3.15965	3.70068	3.62705	3.40971	3.01057	3.70111	3.65757	3.11358	3.26403	3.50534	3.37951	3.4455	3.26732	3.21631	3.23664	3.22826	3.37149	3.36178	3.50221	3.17219	3.1853	3.08361	2.3871	2.05503	1.83634	3.4815	3.36821	3.56148
XS09G0091800.1	3.49215	3.32984	3.49758	3.52426	3.414	3.33225	3.48274	3.82232	3.6727	3.86513	3.74085	3.87847	4.11218	4.00766	4.00289	4.03	3.94204	3.6564	3.69391	3.96609	4.05676	3.86885	3.81003	3.72471	4.05276	4.11038	3.94643	3.95295	3.97032	4.11712	3.53801	3.5638	3.3639	3.38844	3.45426	3.36708	3.30666	3.49022	3.72543	3.92	3.17989	3.34563	3.66126	2.40598	1.9973	3.39169	3.45269	3.49371	3.46935
XS01G0098100.1	3.88109	3.99435	3.66219	4.09932	4.2636	4.17554	3.83983	2.75173	2.47897	2.84949	2.57855	3.52378	3.5486	3.24259	2.83044	2.99646	2.43223	3.79881	3.35709	2.40812	2.27863	2.41171	3.65475	4.1466	3.19887	2.65758	1.66315	2.52893	2.4419	1.6813	1.70085	3.53895	3.53152	3.44469	3.17938	2.80589	3.53658	2.99008	3.09412	3.22199	2.91574	3.4468	2.41725	2.4839	1.65569	2.8058	4.58173	4.51396	4.50364
XS08G0096100.1	2.52294	2.17804	2.22488	2.28394	2.36494	2.46299	2.75979	1.84012	1.90738	2.01773	2.05448	2.61348	3.05511	2.68167	2.3648	2.17212	2.23077	2.5243	2.37002	2.2208	2.27439	2.17212	2.56356	2.87331	2.39865	2.3154	2.9462	2.62829	2.10174	2.53806	2.20493	2.21588	2.50209	2.77703	2.88778	2.80066	2.88967	2.78406	2.49623	3.03609	2.6557	2.87563	3.06077	1.68096	2.58764	2.94131	2.47823	2.4525	2.68557
XS05G0166100.1	2.36286	1.57636	2.40273	1.5378	1.75253	1.46185	1.81884	2.41603	1.97165	2.27179	2.0781	2.14985	2.76055	2.55198	3.09185	2.55491	4.95396	4.09444	4.74277	5.8144	2.51164	5.90316	4.24776	4.58721	5.62747	6.56255	5.79487	4.99931	4.55441	3.85581	3.75108	0.709858	0.3295	0.253174	0.637485	0.777507	0.745483	1.91778	0.903636	0.903931	0.852492	1.79583	0.36781	0	0.192383	2.29586	1.15986	1.53423	2.12957
XS12G0208900.1	3.07877	2.85922	2.74103	2.64428	2.5873	3.02778	3.04107	2.6204	2.94982	2.68565	2.74321	2.91055	3.14693	3.14791	3.07245	2.95374	2.8593	2.84023	2.58937	2.65998	2.78736	2.80407	3.00932	3.17867	3.01088	2.85113	2.6854	2.8576	2.6018	2.64099	2.76186	3.164	3.27789	3.27247	3.4508	3.13703	3.70708	3.18544	3.32213	3.68299	3.16352	3.4798	3.2285	2.874	1.37706	3.27217	2.94763	2.52791	2.7736
XS04G0085600.1	4.44517	4.38035	4.42062	4.52226	4.53218	4.45497	4.42974	4.4273	4.17424	3.95331	3.98804	4.59156	4.24756	4.2578	3.90363	3.979	3.79999	4.20753	4.25263	3.75994	4.06632	3.89427	4.21367	4.31618	3.94235	3.87778	3.99781	3.96819	4.00391	3.96628	3.99818	4.42314	4.24418	3.8599	3.91063	3.7439	3.86575	3.81871	3.87379	3.87508	3.41903	4.17994	4.00064	3.21949	3.75721	2.88057	4.46255	4.55799	4.29178
XS10G0116300.1	2.04864	1.65196	1.85199	1.89651	1.85242	1.7438	1.9946	1.56996	1.45073	1.80328	1.14319	2.00183	2.44101	2.07485	1.83685	1.61816	1.76216	1.94739	1.8183	1.42685	1.22693	2.05218	2.27961	2.10032	2.24117	2.04117	2.25767	2.16182	2.20542	2.36986	2.47885	1.39062	1.20036	1.82635	2.16422	1.64041	1.97615	1.48048	1.70001	1.77456	1.89711	2.26082	1.82967	1.38124	1.4203	1.19405	1.84102	1.6176	1.98242
XS12G0198100.1	0.234624	0.33486	0.377711	0.374855	0	0.44618	0.916574	0	0.104679	0.247098	0.142324	0.242479	0.622109	0.921638	0.266812	0.218225	0.148603	0.231632	0.048767	0.160391	0.343519	0.355684	0.553399	0.115969	0.336761	0.13196	0.273928	0.370769	0	0.167154	0.612359	0	0.295193	0.516383	0.608382	0.270564	0.287331	0.135688	0.265252	0.315903	0	0.0192652	0.128532	0	0	0.238503	0.197128	0.0541169	0.502481
XS11G0092800.1	5.34477	5.52135	5.5193	5.44678	5.4093	5.45784	5.51454	5.50267	5.41033	5.44741	5.55764	5.44708	5.08414	5.18518	5.27367	5.1735	5.23381	5.28275	5.31828	5.11892	5.33134	4.44747	5.0825	5.40607	4.78714	4.4089	4.02547	4.66556	4.49776	4.13414	4.43021	5.49039	5.11271	5.39531	5.32266	4.65366	5.10928	4.81646	5.08581	4.98739	5.48178	5.34082	4.5998	4.93031	4.52331	4.33172	5.34329	5.25984	5.21065
XS15G0053300.1	0	0	0	0	0	0	0	0	0	0	0	0	0	0	0	0	0	0	0	0	0	0	0	0	0	0	0	0	0	0	0	0	0	0	0	0	0	0	0	0	0	0.426027	0	0	0	0	0	0	0
XS10G0121200.1	3.65206	3.45539	3.47281	3.6812	3.87305	3.80671	3.61036	3.19222	2.7467	2.63593	2.34955	3.51969	3.50713	3.15967	3.2378	3.1206	3.0805	3.69219	3.71113	2.95635	2.73767	2.82257	3.70238	3.82662	3.12685	2.83606	3.04386	3.03339	3.32995	3.26719	3.29014	4.01972	4.15354	4.13415	4.00976	3.90698	3.91941	3.20987	3.33705	3.71702	4.19052	4.16757	3.79485	2.5879	2.73859	2.20457	3.72571	3.86587	3.77268
XS05G0166800.1	3.10757	3.14871	3.29764	3.57797	3.5754	3.34767	3.33996	3.93054	3.90648	4.50382	4.03117	3.71468	3.70575	3.77336	4.4309	3.93605	3.74253	3.48634	3.51307	3.74739	3.66102	3.97029	3.167	3.1994	3.78717	3.58879	3.63346	3.79197	3.11245	2.89556	2.6834	1.58261	1.69872	1.60948	1.72975	1.92945	1.94885	2.70861	2.68172	2.7023	1.87762	1.4986	2.27562	0.356601	0.135245	1.96033	2.4189	2.82644	3.11416
XS09G0093100.1	1.10365	1.84922	0	1.51138	1.48432	1.66023	0	0	0.0266423	1.20401	1.03498	0	0.91696	0.693408	0.0364955	0.0555697	0.0988391	1.20032	0.793548	0.759737	0	0	0.458871	0	0.0984978	0.62034	0.421722	0.473581	0.93547	0.155503	1.94619	1.77171	0.076283	2.6729	0.681051	0.0633484	1.79011	2.04332	1.96536	0	2.33242	1.23707	0.236436	0.550487	0.655487	0	0.0504919	1.69581	0.16221
XS11G0097300.1	2.68835	2.94828	2.31512	2.84108	3.1418	3.15927	3.09059	1.69021	1.26186	1.13746	1.83943	2.62034	1.72785	1.9688	1.08843	1.97754	0.241885	2.84299	2.37564	0.176473	1.28226	0.0287293	2.42208	2.89561	0.481174	0.0663403	0.132264	0.357444	0.16538	0.580253	0.310993	2.61652	2.8414	2.84253	3.19155	1.58862	2.00828	1.48545	1.35147	1.40412	1.80484	1.7561	1.08876	0.876013	0.469577	0.0324314	2.2271	3.12358	2.92414
XS12G0206900.1	0.0417764	0.23533	0.134538	0	0.0635146	0.155718	0.0180478	0.0825399	0.163383	0.178907	0.219801	0	0.202552	0.303281	0.0979301	0.253412	0.117206	0.205489	0.182463	0.311081	0	0.313999	0.288177	0.192564	0.299621	0.396091	0.180401	0.215286	0	0.136094	0.15834	0	0.123885	0	0	0	0.0551594	0	0.170605	0	0	0	0.137035	0	0	0.438055	0.122169	0.0826384	0.0851049
XS15G0055400.1	1.79195	1.85912	1.63891	1.66665	1.7735	1.82913	2.22949	1.90971	1.95974	2.38455	2.407	2.41325	2.29101	1.94245	1.94085	1.82169	1.58097	1.63354	1.43886	1.43705	1.90787	1.92677	1.75225	1.97255	1.67333	1.40416	1.28752	1.44872	0.797781	0.874642	0.964334	1.04534	1.52618	1.83592	1.57606	1.30971	1.81621	0.221221	0.686676	0.571635	0.999811	1.07802	1.33656	1.05209	0.251283	1.40275	1.8346	1.65063	1.94035
XS08G0091500.1	3.43211	3.33953	3.32157	3.34764	3.30207	3.44462	3.29689	2.96448	3.09867	3.02222	2.71447	3.32416	3.13969	3.28576	2.99843	2.96256	2.78683	3.20023	3.01103	2.63864	3.34083	2.92794	3.65915	3.17194	2.6409	2.28282	2.68973	2.98136	3.72406	3.8665	3.82297	4.759	4.6199	4.35963	4.13764	4.22199	4.13868	4.1978	4.33364	4.32637	4.50107	4.25308	4.48821	4.05015	3.8525	3.75354	3.76524	3.53749	3.46318
XS12G0205700.1	0.0153296	0	0	0	0	0	0	0	0	0	0	0	0	0	0	0	0	0	0	0	0	0	0.034041	0	0	0	0	0	0	0	0	0	0	0	0	0	0	0	0	0	0	0	0	0	0	0	0	0	0
XS07G0183100.1	0	0	0	0	0	0	0	0	0	0	0	0	0	0	0	0	0	0	0	0	0	0	0	0	0	0	0	0	0	0	0	0	0	0	0	0	0	0	0	0	0	0	0	0	0	0	0	0	0
XS02G0165600.1	3.83906	4.06526	3.53555	4.18428	4.20681	4.48134	3.42435	4.4071	3.91698	4.14059	4.27597	3.70704	2.9343	3.36253	3.59407	3.64642	3.56454	4.37393	4.32658	4.42573	3.23757	3.47993	2.81577	2.87022	3.43703	3.51889	3.99098	4.1155	4.37202	4.33544	4.67441	3.95383	4.03673	2.91674	2.62919	3.78231	3.42446	4.49929	4.25021	4.02073	3.21424	3.64588	3.72145	3.15476	2.48637	3.19116	3.07998	4.5953	3.70452
XS03G0121500.1	4.67019	4.64958	4.51555	4.31953	4.28022	4.44486	4.52058	4.07267	3.97043	3.002	3.10666	4.3491	5.2877	4.42559	3.90977	3.80273	3.48996	3.91624	3.65409	2.77579	4.20426	3.37273	4.97791	4.19635	3.53553	2.65178	3.87521	3.97939	4.68888	4.21148	5.41734	4.15589	3.72155	3.88281	3.65898	2.79163	3.08811	3.07544	3.88146	4.04997	3.32716	3.69473	3.45213	2.42111	2.04977	0.0458277	4.42103	4.27291	4.45309
XS03G0118700.1	1.0104	2.4548	2.08631	2.89469	2.96968	2.40324	3.0622	0.778218	0.395092	0.205195	0.203163	0.418931	2.46758	1.23669	0.142418	0.494184	0.036885	0.142511	0.104235	0.0607677	0.30091	0	0.80003	0.365943	0.109238	0.0904843	1.38355	0.800151	0.61597	0.564276	0.565886	1.21059	1.2024	1.37051	1.89219	1.18805	1.85741	0.916216	0.768228	1.26119	0	6.39751	1.04421	4.37471	6.86608	7.13807	0.111444	0.773355	0.282971
XS01G0100200.1	2.66536	2.20971	2.14049	2.54443	2.72072	2.64377	2.62505	1.99273	1.76991	2.33334	2.22672	2.84006	3.13394	2.87743	2.65764	2.65625	2.6013	2.77668	2.55042	2.1217	2.52397	2.48031	3.10731	3.09201	2.88725	2.4281	2.42679	2.54278	2.55141	3.02068	2.71392	2.72636	2.80332	3.35177	3.27236	2.65081	3.08048	2.09663	1.71262	2.22562	3.00241	2.95039	3.29683	1.50942	1.36672	2.12934	2.68406	2.83095	2.98952
XS15G0043100.1	1.68546	2.15171	1.92882	2.47668	2.36225	2.06277	1.55258	3.17911	2.01881	1.91157	2.58525	1.9359	0.927485	0.924823	1.89227	2.72397	1.10845	1.70245	1.76199	1.41636	2.02403	0	1.25606	1.46965	1.87206	0.617268	0.0803482	0.247427	1.82236	0.457167	1.4803	1.43451	0.9958	1.27305	2.10275	2.54929	2.50725	3.09364	2.89344	0.355227	0.730676	1.09592	0.320885	1.47664	0.135495	0	0.955405	1.48515	0.750405
XS05G0170100.1	0	0	0	0	0	0	0	0	0	0	0	0	0	0	0	0	0	0	0	0	0	0	0	0	0	0	0	0	0	0	0	0	0	0	0	0	0	0	0	0	0	0	0	0	0	0	0	0	0
XS15G0042900.1	0.0609828	0.266406	0.0957952	0	0.399764	0.127927	0	0	0	0.439425	0.303843	0.278109	0	0	0.399177	0.456529	0.277298	0.0776543	0	0	0.253454	0.102835	0.0565794	0	0	0	0	0	0	0	0	0.299016	0	0	0	0	0	0	0	0	0	0	0	0	0	0	0.026453	0.312554	0
XS05G0168400.1	3.13674	2.4762	2.53591	2.73084	2.98588	2.82639	2.87626	2.34469	2.12842	2.76569	2.62084	2.95534	3.38483	3.16627	3.06245	2.87109	3.34306	3.17628	3.27221	3.34351	2.93863	3.4882	3.08935	3.29337	3.51735	3.44842	3.20851	3.44368	3.21438	3.3596	3.23347	2.92569	3.13618	3.36278	3.44911	3.34549	3.66755	3.00138	3.0765	3.26977	3.31716	3.29875	3.16369	2.08596	1.28622	2.93718	2.36439	2.50479	2.93982
XS06G0194100.1	1.60934	1.53617	1.70372	2.0221	1.78767	1.51168	2.25659	3.08612	2.7148	2.30101	2.47466	2.73534	2.18176	2.35785	2.72719	2.71771	2.58863	2.34195	2.61269	3.13219	2.75233	3.0595	2.71423	2.63254	3.33519	3.25171	2.70964	2.86447	3.2458	3.05681	3.43813	1.93794	2.22316	2.40504	2.47924	2.97381	2.79547	2.92574	3.26005	3.54608	1.91137	2.81224	3.15416	1.91042	2.29962	2.74285	1.21062	1.53435	2.10879
XS06G0194000.1	3.23362	3.08237	2.87926	3.08731	3.04084	3.34455	3.1744	3.62638	3.47477	3.36573	3.58624	3.4054	3.18325	3.45594	3.05808	3.1307	2.94499	3.53715	3.40944	3.52183	3.32399	2.78845	3.37161	3.13659	2.40646	2.41452	3.0434	3.46581	3.20825	2.89854	3.79808	3.59378	3.48464	3.37312	3.51091	3.74415	3.48164	3.41078	3.46466	3.21248	2.54993	2.90772	3.04766	2.39889	1.36209	1.59361	2.99324	3.08613	3.19276
XS05G0164000.1	1.01404	0.38282	0.581178	0.472217	0.534709	0.325986	0.330343	0.36534	0.0288589	0.181037	0.18146	0.735486	0.641867	0.912972	0.549003	0.392737	0.113932	0.504259	0.314556	0	0.14637	0.0706747	0.92635	0.872542	0.470696	0.0897078	0.115118	0.31419	0	0.0623323	0	0.406327	0.907854	1.5767	1.3632	0.608167	0.433415	0.433495	0.355427	1.25187	0.632617	0.404874	1.46965	0	0.294601	0.048108	0.750778	0.605223	0.760099
XS05G0171000.1	4.14006	4.37914	4.40127	4.6465	4.76001	4.47136	4.66286	4.9175	4.94396	4.76926	4.93632	4.84261	4.80607	4.8373	5.00178	5.0046	4.49308	4.35895	4.39708	4.76693	4.84454	4.50819	4.33203	4.32955	4.64311	5.22143	4.6661	5.07198	2.49603	2.83877	3.69476	3.27329	3.48053	3.17597	3.23306	2.78351	3.09398	3.40566	3.2603	3.33742	2.45757	2.80926	3.22519	1.63272	1.73138	1.44668	4.25808	4.25195	3.99424
XS02G0166800.1	0.26404	0.685456	0.31694	0.826226	1.09234	0.79958	0.540206	0	0	0	0.0826789	0.0825371	0	0	0.0238171	0.0336765	0	0.266247	0.0151375	0.123924	0	0	0.0869722	0	0	0.12701	0.0488181	0.0828495	0.410764	0.155893	0.229437	0.597303	0.432433	0.409828	0.0416658	0	0.26152	2.36766	2.75208	0.17254	0	0.600692	0.275163	0	0	0	0	0	0
XS03G0119000.1	3.09404	2.67103	2.33717	2.82904	2.84877	2.89613	2.84435	2.10801	2.02288	2.1356	1.94782	3.00902	2.63816	2.5017	2.43748	2.29563	1.86099	2.93748	2.60944	1.57233	2.31377	1.59373	2.96497	3.24583	1.90435	1.53338	1.78783	1.91874	1.87892	2.36554	2.01403	3.10596	3.39119	3.35882	3.07769	2.1933	2.71124	1.8486	1.97567	2.72374	2.62609	2.74399	2.3484	1.30984	1.37649	1.55957	3.18132	3.3054	3.21036
XS11G0092700.1	3.68848	3.31638	3.30595	3.47368	3.52066	3.62655	3.58123	3.48292	3.88116	3.73231	3.75072	3.79972	3.86351	3.76572	3.86977	3.80163	3.83901	3.85052	3.69296	3.77758	3.71413	3.84699	3.98301	3.95832	4.01433	3.75054	3.58634	3.70709	4.16944	4.41503	4.13321	3.97393	3.88618	3.93564	3.89923	3.77428	4.11258	3.76211	3.73222	4.22587	3.79806	3.97803	3.95386	3.09108	2.19484	3.54439	3.40819	3.71345	3.7211
XS08G0091900.1	1.73569	1.98157	1.76371	1.9806	1.67318	1.63021	2.39475	1.90689	1.58071	1.53816	1.68519	1.95787	2.14903	2.01672	1.69148	1.60116	1.39626	1.47161	1.29374	1.34715	1.68415	1.53907	2.15036	1.5874	1.42559	1.57355	2.27028	2.1074	2.04186	2.09874	2.4899	2.89675	2.50278	2.71125	2.92554	2.49459	2.72616	2.7724	2.63132	2.57822	2.63523	2.61008	2.57411	2.43346	1.47491	1.74318	1.12063	1.2183	1.52502
XS09G0084000.1	3.33178	3.3593	3.38794	3.53376	3.565	3.37333	3.44114	3.27706	3.18133	3.21655	3.34248	3.39258	3.51809	3.53591	3.55682	3.37675	3.37579	3.36103	3.43319	3.09956	3.28575	3.3185	3.21779	3.46442	3.34604	3.04975	3.36623	3.43262	1.83183	1.46426	1.83756	2.21305	2.62143	2.30274	2.57026	2.38548	2.33898	1.78061	1.57602	1.83623	2.42745	1.6789	2.48525	1.00568	1.62626	1.74928	3.35724	3.16328	3.25605
XS03G0121000.1	1.39533	2.00973	2.41006	2.35496	1.77335	1.9718	1.47537	3.04518	2.91871	1.64669	2.76789	1.49485	3.3392	1.81113	2.49953	2.57433	2.8831	2.20732	3.41546	4.32125	1.14095	4.88572	3.13284	2.83322	5.11046	6.10287	4.04903	3.26687	3.60381	3.34843	1.28001	1.12706	0.810873	0.691073	0.463034	0.895727	0.704595	0.904246	1.22007	2.30508	0	0	0.361393	1.12754	0	0	1.29842	1.61923	1.04939
XS01G0100800.1	0	0	0	0	0	0	0	0	0	0	0	0	0	0	0	0	0	0	0	0	0	0	0	0	0	0.0275335	0	0	0	0	0	0	0	0	0	0	0	0	0	0	0	0	0	0	0	0	0	0	0
XS09G0092000.1	4.02134	4.1439	4.18792	3.95857	3.96399	4.05788	3.88038	3.48639	3.34986	2.85118	2.7	3.45519	3.23074	3.40951	3.05971	2.98981	2.45137	3.54389	3.49872	2.36125	3.25867	1.9973	3.28737	3.51185	2.33686	2.03072	2.49055	2.65205	2.2931	2.43626	2.24223	3.94671	4.00861	3.26505	3.34296	2.87339	3.27708	3.4211	3.36664	3.56386	3.24529	3.93211	3.05445	3.44253	3.46037	2.92719	4.58803	4.12829	3.90772
XS15G0041500.1	0	1.1154	1.19676	1.52349	0.898942	0.788408	1.45288	4.22759	3.95937	3.06643	4.04931	3.74994	1.26849	2.88914	2.01383	4.24311	0	0	0	0	3.7363	0	0	0	0	0.157883	0	0.459753	0	0	0	0	0	0	0	0	0	0	0	0	0	0	0	0	0	0	0	0	0.513657
XS15G0038100.1	3.26183	3.4752	3.52114	3.32613	3.54861	3.585	3.49188	3.33672	3.4844	3.43799	3.35076	3.43769	3.90258	4.06161	3.43043	3.42347	3.0369	3.16499	3.1877	2.91405	3.32808	3.16316	3.4164	3.34644	3.04631	2.85092	3.43672	3.57781	1.88963	2.92532	2.56631	2.76504	3.03634	3.11609	3.24933	3.01484	3.10379	2.86103	2.82726	3.33314	3.0855	3.05158	3.19583	2.24976	1.91635	2.67489	3.51214	3.26585	3.09585
XS08G0092200.1	1.31243	1.20856	1.27214	1.3056	1.0625	1.08201	1.61425	1.55888	1.51547	1.11789	1.34355	1.52432	1.58319	1.74212	1.51395	1.48624	1.32119	1.32089	1.11073	1.41113	1.39588	1.40104	1.33926	1.31786	1.3518	1.38732	1.55232	1.75405	1.13707	1.15704	1.25752	1.33556	1.45393	1.60183	1.74371	1.81532	1.15106	1.30071	1.64172	1.37467	1.21455	1.47251	1.51131	0.296152	0.316265	0.666466	0.944335	1.13388	1.30564
XS02G0162600.1	2.97549	2.67776	2.73556	2.65824	2.88585	3.08528	2.66106	2.9883	2.99479	2.49831	2.69374	2.92509	2.80823	2.83665	2.88076	2.88193	2.57407	2.99461	2.98081	2.71701	2.47898	2.527	2.95444	3.11101	2.75213	2.48071	2.63045	2.87543	2.43982	2.31631	2.60912	2.475	2.56804	2.51364	1.95547	2.29341	1.93396	2.36881	2.20067	2.35088	2.31129	2.18901	1.84752	1.89709	0.765164	1.93522	3.18036	3.28243	2.92196
XS01G0099100.1	5.24334	5.85569	5.71321	5.10212	5.006	5.41418	5.49701	5.49703	5.68949	4.93741	5.22937	5.03263	5.00682	5.1499	4.76712	5.03923	4.75598	5.10351	5.19493	4.47185	5.19149	4.32792	4.44714	5.20075	4.42101	4.29567	4.78558	4.69368	2.57206	2.76469	3.01474	3.34118	4.01006	3.44106	3.59113	3.21354	3.09911	3.07916	3.37728	3.26075	3.44866	3.79751	2.97866	3.29174	2.88439	3.09417	5.60018	5.34317	5.02358
XS10G0120100.1	1.414	1.52827	1.66758	1.37843	1.22784	1.45771	1.25418	1.26757	0.971942	1.07715	1.0852	1.32018	1.46366	1.51107	1.49742	1.47189	1.57297	1.56081	1.42624	1.06871	1.24301	1.51307	1.73114	1.75222	1.81487	1.19829	1.15252	1.32013	0.942322	0.662756	1.19234	1.1805	0.792751	1.31575	1.58426	0.898461	1.03797	1.84624	1.62549	0.759185	0.563796	0.707105	0.800906	0.707153	0.0445287	1.16081	1.47964	1.38204	1.28069
XS14G0113500.1	3.49397	3.87847	3.56501	3.53712	3.67093	3.50343	3.42235	3.11873	2.81806	3.13573	2.44931	3.26174	3.18946	3.37762	3.07621	3.29053	2.55327	3.30349	2.74619	2.3828	2.24907	2.93533	3.18128	3.18517	3.46819	2.48731	1.47259	2.24728	2.60493	2.22085	1.75225	1.74529	1.74327	1.97939	2.37142	2.29503	2.01774	1.77055	1.84235	2.05295	2.11568	2.89633	1.76514	1.70952	1.33362	0.426423	3.90022	3.77632	4.38617
XS05G0167100.1	1.32722	0.861548	0.895276	1.20023	1.72223	1.26043	1.28431	0.419575	0.206227	0.161999	0.0584997	0.865369	1.69102	0.969908	0.0784183	0.203031	0.0511863	0.897684	0.809675	0.104334	0	0.286445	1.65851	0.701702	0.59904	0.0892851	1.25274	0.829133	0.372627	0.529774	0.348539	0.902779	1.04109	2.58192	0.781193	0.384689	0.118603	0.185227	0.132812	0.701941	5.1202	3.19685	0.869108	2.57017	0	0	0.486018	0.421528	0.310117
XS06G0192400.1	0	0	0	0	0	0	0	0	0	0	0	0	0	0	0	0	0	0	0	0	0	0	0	0	0	0	0	0	0	0	0	0	0	0	0	0	0	0	0	0	0	0	0	0	0	0	0	0	0
XS15G0056100.1	6.34183	6.89773	6.81598	7.1337	7.29937	6.96991	6.77338	6.86759	5.87037	6.65536	5.78438	6.65029	6.16137	5.95291	6.04014	6.43693	6.12945	6.79414	6.28198	5.9873	5.23835	6.66399	6.23493	6.54458	6.83605	5.96625	4.93327	5.40318	5.80291	5.65698	4.7808	4.073	4.15193	4.04539	4.74549	5.40261	4.5579	5.07192	4.84846	4.86455	4.26092	4.7048	4.38895	3.72941	3.0579	2.26679	6.91552	7.11166	7.35436
XS08G0096000.1	2.79638	2.55911	2.62701	2.73766	2.78273	2.80413	2.6514	2.07777	2.33765	2.35319	2.52245	2.4779	3.0728	2.59206	2.64189	2.61863	2.4607	2.90443	2.87171	2.58855	2.23657	2.10187	3.25305	3.18724	2.7502	2.59762	3.04581	2.55554	2.52377	2.94992	2.43371	2.98528	2.88163	3.18834	3.30369	3.20545	3.25159	3.13463	3.052	3.51381	3.30629	2.80026	3.76661	2.21817	2.21358	3.31748	2.84704	2.90051	2.61625
XS15G0037700.1	3.94377	3.76044	3.71337	3.90418	3.79347	4.00865	3.79835	2.78845	2.99468	3.21792	2.97666	3.77722	3.74481	3.57665	3.38102	3.36938	2.92587	3.80614	3.71185	2.61514	3.35361	2.86493	3.75343	3.86217	2.98782	2.5573	2.92549	3.21202	3.32243	3.6423	3.42026	4.27246	4.32838	4.09472	4.00047	3.62293	3.7652	3.84503	3.84673	3.88771	3.62308	4.06064	3.7893	3.60086	3.09534	3.1665	3.96274	4.11007	3.91527
XS09G0088900.1	0	0	0	0	0	0	0	0	0	0	0	0	0	0	0	0	0	0	0	0	0	0	0	0	0	0	0	0	0	0	0	0	0	0	0	0	0	0	0	0	0	0	0	0	0	0	0	0	0
XS07G0179700.1	0	0	0	0	0	0	0	0	0	0	0	0	0	0	0	0	0	0	0	0	0	0	0	0	0	0	0	0	0	0	0	0	0	0	0	0	0	0	0	0	0	0	0	0	0	0	0	0	0
XS07G0183000.1	3.93522	3.70879	3.7777	3.89445	4.08227	4.06521	4.05191	3.65017	3.67736	3.82108	3.82935	4.21591	3.92656	4.03749	4.11528	4.02988	3.89053	4.16556	4.12899	3.68954	4.01001	3.60657	3.96512	4.28242	3.79221	3.51634	3.4377	3.81599	3.59545	3.6373	3.6408	3.94484	4.04956	4.13669	3.99687	3.83608	3.92265	3.73336	3.68151	3.94236	3.96563	4.17118	3.52093	3.06294	2.95499	3.65755	4.03101	4.2295	4.23347
XS03G0119400.1	2.545	2.67699	2.50601	2.67186	2.77008	2.70573	2.68228	1.7323	1.8619	1.79153	1.48893	2.45415	2.39868	2.41506	2.05061	1.8661	1.64819	2.34183	2.26057	1.34997	1.89338	1.72941	2.57067	2.75239	1.98671	1.8212	1.58132	1.63382	1.18562	0.881528	0.958115	1.61881	1.64544	1.8973	1.78191	0.854555	1.41173	1.34516	1.27925	0.866951	1.41788	1.78781	1.3514	1.23098	0.566411	1.89069	2.942	2.74982	2.39429
XS05G0162700.1	0.0274242	0	0.281206	0	0.0485301	0	0	0	0.0683045	0	0	0	0	0	0	0.0210943	0	0	0	0	0	0	0	0	0	0	0.0188214	0	0	0	0.409401	0.354356	0.270991	0	0	0	0	0	0	0	0	0	0	0	0	0	0.0235905	0.102106	0
XS02G0166700.1	2.74108	2.81274	2.44186	2.45974	2.44774	2.64934	2.49438	2.50231	2.48142	2.67095	2.67691	2.57147	2.73878	2.80292	2.90754	2.72999	2.80646	2.69063	2.48371	2.69408	2.37913	2.59229	3.19718	3.11253	2.95245	2.86583	2.18579	2.45197	3.13124	2.89869	2.90979	2.9497	2.93341	3.41487	2.9725	2.67154	3.13704	2.85801	2.84428	2.91013	3.14824	3.2228	2.8449	1.58251	0.839684	2.17525	2.77841	2.74929	2.97145
XS15G0042600.1	0	0	0	0	0	0	0	0	0	0	0	0	0.108039	0.0385015	0	0	0	0	0	0	0	0	0	0	0	0	0.0526494	0.0600108	0	0	0	0	0	0	0	0	0	0	0	0	0	0	0	0	0	0	0	0	0
XS04G0083800.1	3.58018	3.54335	3.32592	3.8026	3.85681	3.76827	3.95047	3.28811	3.31951	3.50671	3.42684	3.75247	3.3355	3.08292	3.69647	3.32853	3.52384	3.62807	3.37651	3.25817	3.13651	3.56035	3.36637	3.98095	3.45666	3.11679	3.01896	3.04021	2.68014	2.74007	2.48718	3.30275	3.40759	3.85441	3.69184	3.25705	3.23939	2.90014	2.98056	2.68977	3.6979	3.64757	2.49316	2.70159	1.14511	1.13909	3.33486	3.43714	3.61002
XS01G0098200.1	3.47477	3.82781	3.73224	3.85985	3.57581	3.95022	4.23814	4.3343	4.37514	3.23138	4.02323	4.69146	4.372	4.58312	2.59489	4.33015	0.51128	3.40683	3.21354	0.601521	4.1024	0.043026	3.09903	3.65544	1.05132	0.385837	0.683031	1.92063	0.331108	1.17704	1.40356	4.11915	4.0763	3.44305	3.12996	2.39481	2.45374	1.68765	2.58157	2.55224	1.47059	3.96727	1.85831	0	0.250775	0	3.84627	4.19429	3.66911
XS08G0093800.1	2.23539	1.90826	2.04223	2.34799	1.97821	1.91098	2.12795	2.44664	2.47692	2.16301	2.17351	2.07679	2.01486	2.06212	2.29887	2.27188	2.20947	2.10592	1.93743	2.24783	1.72621	1.8844	2.31178	2.17625	2.06774	2.21392	1.94158	2.14253	2.01952	1.85655	2.37823	2.44084	2.4236	2.49723	2.6699	3.27524	2.31284	2.3762	2.51531	2.09253	2.35453	2.00007	3.02101	1.14296	0.425796	1.51956	1.70569	1.88708	1.59329
XS15G0045300.1	4.21027	4.51867	4.22186	4.69659	4.59367	4.42729	4.33599	4.14289	3.9616	3.99306	3.94446	4.42827	4.13927	4.24288	4.02185	4.23088	3.56405	4.1539	3.86438	3.43623	3.95117	3.42969	4.02926	4.32083	4.00919	3.32406	3.22215	3.74866	3.43904	3.10148	2.88892	3.21324	3.46994	3.24907	3.32737	3.1146	3.1328	2.99176	2.9945	2.96093	3.07287	2.98992	3.11898	2.15964	1.84025	2.38544	4.34758	4.59576	4.84324
XS01G0097700.1	0.0208681	0.30808	0.764949	0.721639	0.237315	0.331881	0.201794	2.10123	1.99205	2.33123	1.85684	0.459315	0.68554	1.25007	2.73722	2.63687	0.555732	0.347048	0.364808	0.246959	0.816825	0	0.328019	0.946504	0.0472483	0	0.0496108	0.325895	0	0	0.372315	1.25477	0	1.46895	1.84283	0.682564	3.11394	2.44508	4.16058	0.361549	0	0.52822	0.70992	0	0	0	0	0	0.0460222
XS01G0100300.1	2.89142	2.8753	2.59873	3.04912	3.27127	3.12837	2.98327	2.42835	2.44106	2.72321	2.26588	2.86642	2.56378	2.86391	2.74628	2.70211	2.46063	2.86998	2.67895	2.10458	2.37342	2.24018	3.05545	2.98551	2.75691	2.0682	1.88059	2.3549	2.53902	2.76786	2.36432	2.89853	2.63039	2.6986	2.57852	2.25465	2.45646	2.51943	2.33942	2.68481	2.48754	3.0884	2.81641	2.07394	2.51224	1.96434	3.27372	3.38719	3.42398
XS13G0223500.1	3.48682	3.04644	3.2121	3.39085	3.36073	3.28899	3.61385	3.3468	3.48414	3.55663	3.59856	3.8542	3.64141	3.78156	3.81353	3.7221	3.64437	3.577	3.57353	3.52766	4.02121	3.80526	3.46585	3.689	3.90019	3.61762	3.61193	3.7502	2.83229	2.91766	2.81077	2.51086	2.73937	2.71544	2.5971	2.421	2.46483	2.23738	2.22443	2.70699	2.54817	2.63473	2.70253	1.59863	1.29295	2.32156	3.46416	3.39858	3.51857
XS04G0085200.1	0.640733	0.643296	0.602654	0.59271	0.460776	0.661211	0.856695	0.721745	0.73989	0.661528	0.662497	0.730301	0.794692	0.732706	0.920585	0.673757	0.688654	0.713598	0.468855	0.530265	0.655175	0.959913	0.787695	0.569903	0.747151	0.604354	0.580258	0.868638	0.18829	0.754147	0.899632	0.781463	0.878962	0.802641	1.05983	0.858371	0.826699	0.838628	0.942945	1.35914	0	0.897978	0.869849	0	0	0.412224	0.902304	0.709067	0.669332
XS12G0198500.1	3.8608	4.08256	3.51433	4.45778	4.80342	4.46749	4.3158	0.817094	2.26242	4.56802	3.26627	4.28408	2.46415	3.13346	5.38815	4.32905	2.64605	4.11516	3.68401	1.14548	0.198809	0.621275	3.56141	4.81224	2.02542	0.824397	0.588957	2.4622	0.765201	1.25592	3.55052	5.71343	5.84588	6.44893	4.00781	1.35725	0.949994	1.782	1.45075	1.57888	7.60268	5.41987	1.37375	3.98201	0.292216	0.216613	3.91629	4.97538	5.16986
XS10G0120500.1	3.88642	3.53909	3.37971	3.80791	3.41861	3.73507	4.20003	1.46739	1.7139	0.525735	1.39144	3.09867	3.98464	3.20275	1.65851	1.85059	1.64315	2.90998	2.81189	1.54702	0.815729	1.43051	3.84742	3.46664	2.37579	1.88891	4.032	3.27435	3.4888	3.84547	4.22145	4.54612	3.99912	4.06077	3.64678	2.51913	2.60593	2.46258	3.01638	2.73276	3.6029	3.02051	2.64411	0.854364	0.340705	0.267098	3.74389	3.84995	3.63271
XS05G0167500.1	1.90229	1.92153	2.24657	2.6771	3.56611	2.30205	1.33732	2.01108	0.917701	1.68726	0.564423	0.617404	3.9698	1.76835	1.81317	0.268416	2.54588	1.7654	2.22628	2.75916	0.0826771	1.90421	3.86828	2.04114	2.502	1.85768	4.01337	3.56339	1.3368	0.714263	1.53849	0	0	0	0	0	0	0.528576	0.948424	0.342593	0	0	0	0	0	0	0.0106484	0.0937192	0.205981
XS12G0210500.1	4.42027	5.74624	5.58271	5.839	5.53413	5.65837	5.67577	5.90319	5.87737	5.91861	6.12968	5.66172	5.40561	5.45275	5.56395	5.55022	5.37625	5.21066	5.35394	5.16099	5.14102	4.71421	5.10048	5.16578	4.92364	4.50011	4.90638	5.09807	4.29468	4.15147	4.3588	4.90516	4.9822	4.90238	4.75504	4.72708	4.77705	4.64361	4.8235	4.73908	5.30942	4.67159	4.54892	2.85833	0.671537	0.131365	0.272885	0.32124	0.259962
XS10G0122000.1	3.2502	3.4593	3.22666	3.52346	3.75405	3.54599	3.68149	2.7015	2.6445	2.95647	2.70209	3.43673	3.28116	3.25094	2.95352	3.178	2.51911	3.20998	3.13216	2.11517	3.31684	2.28802	3.12273	3.25016	2.46926	2.03547	1.9782	2.51206	2.72099	3.21728	3.00451	3.89799	4.09463	3.92127	4.17041	3.83797	4.06085	3.71361	3.5814	3.69429	3.87801	3.50196	3.56708	2.44057	2.59389	2.22971	3.32805	3.48652	3.1645
XS07G0180600.1	3.56897	2.83048	2.48873	2.69274	2.84782	3.27343	2.48687	1.13877	1.19973	0.96733	1.02007	2.91166	2.54099	2.31618	1.24231	1.53141	0.658974	3.265	2.96269	0.429051	0.848407	0.636361	3.14226	3.54367	1.30607	0.795907	0.625199	0.772688	1.32824	1.90563	1.60146	3.99612	3.53875	3.50584	3.31645	2.35421	2.83953	2.6315	2.68486	2.71072	1.88422	4.19408	2.79054	2.57846	1.84848	1.78632	3.76497	4.06382	3.5584
XS04G0092300.1	3.00809	2.99827	3.44001	3.15984	3.11908	3.21989	3.81388	3.43944	3.40285	2.78278	2.55735	3.83867	3.87695	3.94825	3.78031	3.7244	3.39975	2.90937	2.86107	2.38848	3.64624	3.0472	2.90775	3.80223	3.42241	1.97022	3.13245	3.62422	1.96135	3.06681	2.98812	2.66429	3.50928	3.33691	2.85573	3.29937	2.66196	2.05816	2.22711	3.30717	3.33261	2.66151	3.16529	2.079	2.06366	1.72777	3.3905	3.07275	3.30455
XS09G0090100.1	0.708585	0.843203	0.723073	0.607541	0.918921	0.7684	0.607943	0.815613	0.58146	0.958471	0.612523	0.528537	3.29778	1.47128	0.71921	0.368846	1.04757	1.1839	1.18761	1.44246	0.704977	1.92263	0.909509	0.930158	1.55532	1.38859	2.46071	2.35874	1.10966	1.15717	0.801976	0.263879	0.389827	0.417393	0.272555	0.40113	0	0.160571	0.420234	0	0	0.28222	0.422613	0.0472108	0	0	0.644454	0.867406	0.625239
XS03G0118200.1	2.42898	2.08169	1.78665	2.22731	1.96458	2.44055	1.46469	1.92523	1.74776	0.829814	0.875314	1.98777	0.765347	0.749677	0.864807	1.17778	0.365624	2.12007	1.48537	0.331864	0.0993185	0.131016	2.31632	2.48292	0.507413	0.252145	0.214911	0.184366	0.772737	0.573613	0.781063	3.96888	4.04291	3.1461	2.59078	1.20674	2.11295	1.51384	1.69038	1.70999	1.96912	3.16804	0.933396	1.69826	0.808749	0.0710408	3.08836	2.84707	2.54355
XS12G0213600.1	0.615277	0	0.202549	0.317941	0	0	0.163501	0	0	0.163787	0.144512	0	1.03937	0.319666	0.312818	0.152201	1.09265	0.612301	0.688575	0.747622	0	1.47465	1.10394	0.451498	0.913206	0.666847	1.35964	1.26308	1.26698	1.77023	1.73822	0.586987	0	0.647074	0	1.12346	0.304468	1.83711	1.0889	0	0.562826	0	0.364228	0	0	0	0.369246	0.469619	0.381828
XS12G0213900.1	0	0	0	0	0	0	0	0	0	0	0	0	0	0	0	0	0	0	0	0	0	0	0	0	0	0	0	0	0	0	0	0	0	0	0	0	0	0	0	0	0	0	0	0	0	0	0	0	0
XS10G0120900.1	3.35365	3.2443	3.19692	3.43952	3.47162	3.40451	3.41092	3.25349	3.23946	3.35715	3.22754	3.35788	3.71918	3.58159	3.28491	3.28796	3.03546	3.26272	3.14032	3.00997	3.1465	3.01386	3.28392	3.35702	3.13517	2.99195	3.34013	3.49892	2.37338	2.8703	2.8425	2.88059	2.74869	2.89248	2.82354	2.66195	3.17658	2.89987	2.69611	3.11154	2.36164	2.57423	2.91964	1.90597	1.43454	2.61386	3.28391	3.20843	3.16881
XS15G0040600.1	0.54838	0.324383	0.294076	0	0	0.479648	0.0762966	0.406993	0.074167	0	0.0747994	0.152288	0.966299	0.608004	0.111938	0.331876	0.335891	0.153121	0.543649	0	0	0.262943	0.544033	0.452127	0.164642	0.723961	1.0299	0.852711	0.950856	1.47579	1.6961	1.38534	1.06972	0.78976	0.60918	1.21712	1.09418	1.44481	0.864355	1.31431	0	1.09389	1.19668	5.80863	7.42786	7.49411	0	0.286009	0.323358
XS05G0165700.1	4.13332	4.78965	4.73715	4.95949	4.74727	4.63717	4.56557	5.54587	5.39893	4.6848	5.0012	5.25577	4.66459	5.00463	4.62795	5.07261	4.72961	4.34951	4.58762	4.72599	5.40448	4.82383	4.51197	4.34908	4.91011	4.58139	4.86742	4.88005	4.40509	4.23905	4.64957	3.70504	3.57411	3.54826	3.88415	2.93902	3.68048	3.62125	3.44626	3.23064	4.32338	3.42408	2.90855	2.72223	3.51108	1.45524	4.4454	4.36455	4.03008
XS01G0099800.1	2.36243	2.12116	2.63692	2.94821	2.18306	2.67269	3.1769	2.3392	2.53878	1.60948	2.97968	2.50329	2.0819	2.17154	2.46866	2.93077	1.43012	2.51745	2.43467	2.8374	1.44184	2.631	3.0665	2.67357	2.75147	3.87802	3.39656	2.87962	1.44137	1.8598	0.77821	3.8167	4.19816	2.68791	2.80701	2.27656	1.98575	1.42501	1.85042	1.82589	1.88422	2.02749	2.29527	0.397836	0.376936	1.67413	3.12986	3.06497	2.42123
XS15G0042300.1	3.69096	3.81491	3.64914	3.39926	3.47973	3.75944	3.6917	3.51947	3.89235	3.6115	3.79216	3.33591	3.97066	3.80286	3.63059	3.55865	3.77301	3.70539	3.58004	3.76715	3.38742	3.66475	3.73793	3.78572	3.89263	3.79614	3.72104	3.76107	3.43948	3.34375	3.61386	3.35303	3.41496	3.48561	3.5148	3.13951	3.40768	3.42215	3.42496	3.49229	3.17536	3.25865	2.84865	2.85058	1.78817	2.79092	3.63634	3.59234	3.4558
XS13G0222200.1	5.20253	1.57034	5.51504	1.18221	0.0842336	0.568723	0.148077	2.33811	1.78979	2.58083	1.45346	2.03365	1.01805	1.50928	2.51699	0.667493	1.62662	3.80032	3.41755	2.1981	0.129232	0.131595	1.17473	1.46377	3.81074	1.96871	0.796208	0.738489	0.348092	0	0.113739	1.37973	0	0.152306	0.131735	0	0	0	0	0	0	0	0	0.160101	0	0	3.92387	1.45923	4.38493
XS12G0215700.1	4.27604	4.70337	4.75653	5.01221	3.75117	5.1096	4.54133	4.5656	4.21937	3.46892	4.29128	5.32765	1.82396	2.75019	2.81528	3.83187	1.01606	5.63654	5.33119	0.2617	2.24901	0.0471813	5.1905	5.81399	0.764746	0.144973	0.0633531	0.514892	0.311906	0	0.727411	5.14922	4.03196	4.57529	4.85149	0.669063	2.01568	0.826497	2.20905	0.250226	0.634832	3.49242	1.01968	0.417041	0.281391	0	3.80798	3.48564	2.95032
XS12G0213700.1	0	0	0	0	0	0	0	0	0	0	0	0	0	0	0	0	0	0	0	0	0	0	0	0	0	0	0	0	0	0	0	0	0	0	0	0	0	0	0	0	0	0	0	0	0	0	0	0	0
XS13G0220500.1	4.26441	4.50078	4.42662	4.75131	4.62839	4.74915	4.39798	4.73698	4.81392	5.25555	4.99733	5.10914	4.03835	4.79712	5.25304	5.15694	5.10252	5.16172	5.07528	5.33935	4.83248	5.22823	4.42689	4.64	5.01883	4.64965	4.20036	4.8658	4.6637	3.68678	3.83679	2.97535	3.34948	3.28227	3.47159	4.10581	3.50255	4.05972	4.15889	4.23267	3.67966	2.90185	3.27344	2.15941	1.71968	1.82794	4.03316	4.75692	4.61703
XS08G0095000.1	3.03542	3.37298	3.03171	3.5364	3.30363	3.4757	3.51211	2.37438	2.58175	2.42818	2.37525	3.05019	3.19596	3.04643	2.78634	2.91799	2.09643	2.77059	2.50183	1.59679	2.75539	1.75827	2.99229	2.9492	2.18963	1.58344	2.00476	2.35907	2.33524	2.79582	2.67933	3.89849	3.82418	3.96338	4.10057	3.69371	4.2671	3.42708	3.43347	3.47814	3.36997	4.07814	3.1185	2.97304	2.40565	2.50352	3.12587	3.22842	3.22428
XS15G0053500.1	4.2858	4.83669	4.71373	4.75963	4.78258	4.70598	4.62539	4.50626	4.0973	4.12883	3.68354	4.61392	3.83426	4.15909	4.29554	4.34164	3.6483	4.26076	3.97448	3.06743	3.54434	3.48761	3.74331	4.42549	4.22979	3.12968	2.04383	3.01156	2.10765	1.7504	1.44115	2.08903	2.27318	1.85199	2.25843	2.01174	1.79573	1.63745	2.02453	2.07186	1.78555	2.08722	1.237	1.62959	0.906056	1.25974	4.43722	4.52482	5.13957
XS10G0116200.1	2.19342	1.57979	1.98829	2.2853	2.34669	2.08688	2.47318	1.89851	1.62005	1.55408	1.11834	2.59556	2.74375	2.28852	1.95462	1.77488	1.99373	2.08009	1.63103	1.61741	1.72699	2.47454	2.52945	2.51594	2.32374	2.2284	2.27341	2.2705	2.28259	2.81569	2.57847	2.01057	2.06806	2.384	2.77774	1.76251	2.218	1.88383	1.77868	2.23666	2.02935	2.63383	1.97703	1.3936	1.66283	1.69304	1.85856	2.179	2.36733
XS10G0121100.1	3.62334	3.50519	3.59813	3.60707	3.6803	3.60808	3.62491	3.0822	2.90928	2.8915	2.77206	3.46788	3.51078	3.47344	2.8783	3.04274	2.2653	3.12183	3.06281	2.1622	3.16922	2.13974	3.39636	3.56484	2.8276	2.10513	2.17297	2.61097	2.08933	2.55979	2.89359	3.32023	3.25738	3.32238	3.43422	2.8709	3.11439	2.57947	2.87403	2.98392	3.03725	3.27002	2.88772	2.0545	1.84582	0.505363	3.89715	3.85435	3.93724
XS15G0057200.1	4.28166	4.64146	4.53958	4.39804	4.50182	4.55776	4.25497	4.65662	4.77046	4.86947	4.61681	4.54587	4.07881	4.46606	4.41082	4.57452	4.44283	4.59671	4.3138	4.51792	4.15479	4.38562	4.4218	4.12921	4.11442	3.6749	3.69734	4.34077	4.29117	3.66974	3.66527	3.55439	3.51587	3.29291	3.59143	3.49697	3.42735	3.58571	3.62633	3.83459	3.11705	3.29691	3.21887	2.84414	1.64741	2.37616	4.79469	4.85942	5.01619
XS05G0164500.1	2.85487	1.38743	2.26779	1.65129	1.98919	2.11199	2.61966	3.6416	3.85509	3.95683	3.33979	3.60525	4.45863	4.73902	4.5514	4.06537	4.33075	3.59198	3.59931	4.10096	4.78367	4.35383	3.95051	3.98226	4.1156	3.22701	4.2721	4.79752	4.59072	4.84025	5.31619	4.47505	4.05986	4.55418	4.43732	5.16333	5.29508	4.85231	5.13445	5.53444	3.96222	3.88199	4.78518	1.03855	0.822886	0.168109	1.83302	1.89616	2.17666
XS05G0169100.1	0	0	0	0	0	0	0	0	0	0	0	0	0	0	0	0	0	0	0	0	0	0	0	0	0	0	0	0	0	0	0	0	0	0	0	0	0	0	0	0	0	0	0	0	0	0	0	0	0
XS05G0166900.1	1.89036	1.23108	1.70644	1.89156	2.46369	1.53093	0.85702	0.254834	0.689966	0	0.0973408	0.634864	0.558387	0.591256	0.247684	0.312563	0	1.99255	2.15973	0	0	0	4.02745	1.80025	0	0	0	0	0.820328	1.01202	1.49164	3.68789	4.16552	3.71932	4.86346	6.52951	6.24843	5.97075	6.06591	3.78161	0	0.621318	1.30165	0.48198	0.942189	0.0926211	0.521977	0.465341	0.201088
XS09G0093000.1	2.43548	3.07358	1.02786	3.14065	3.34648	3.03687	1.34731	1.04239	0.784791	2.82864	2.46677	1.22604	2.74133	2.36357	1.19648	1.36645	0.795888	2.55829	2.06168	1.9796	0.594277	0.590353	2.1609	1.08257	1.00226	1.74569	1.56631	1.70869	1.68671	0.812861	2.41783	2.04435	0.781661	2.39776	1.5103	0.688859	2.19319	2.54849	2.08057	0.205063	1.92248	1.68045	0.225222	0.366654	0	0	1.26521	3.10788	1.54657
XS01G0091800.1	0	0	0	0	0	0	0	0	0	0	0	0	0	0	0	0	0	0	0	0	0	0	0	0	0	0	0	0	0	0	0	0	0	0	0	0	0	0	0	0	0	0	0	0	0	0	0	0	0
XS15G0055500.1	0.909606	0.758018	0.52463	0.950246	1.35231	1.11685	1.26908	0.995921	0.894017	1.23172	1.36183	1.65529	1.35265	1.15791	1.07127	1.13617	0.948979	0.911832	0.87113	0.536283	0.998869	0.911374	1.01747	1.26828	0.97304	0.795659	0.746088	0.800054	0.512409	0.359288	0.623147	1.27699	1.10433	1.6709	1.58765	1.11931	1.51474	1.03758	0.97271	0.998062	1.24543	1.36216	1.0904	0.429614	0.247737	0.575032	0.675139	0.995322	1.10161
XS02G0163000.1	2.91279	3.42355	3.07951	3.29323	3.36005	3.32968	3.13926	3.54009	3.37121	3.37506	3.6662	3.23746	2.95088	2.95189	2.87502	2.99327	2.39516	3.08834	2.9618	2.11315	2.11567	2.19814	3.07542	3.21708	2.23169	1.92827	2.0444	2.47223	2.67557	2.84919	2.98242	3.58067	3.70232	3.51882	3.56235	3.31176	3.41278	3.47089	3.54866	3.88257	3.5276	2.84736	3.44121	1.98392	1.39501	2.28191	3.06114	3.04959	2.90197
XS05G0162800.1	4.0162	4.41484	4.42991	4.55079	4.35803	4.31331	4.41778	4.57102	4.60549	4.28644	4.39524	4.26065	4.42594	4.43648	4.2546	4.28655	4.04778	4.09104	4.04492	3.8641	4.33428	3.72679	4.19356	4.1617	3.99538	3.70793	3.88771	4.15831	3.75234	3.91959	4.35162	4.37321	4.12264	4.50247	4.50986	4.51699	4.74438	4.58062	4.60086	4.13538	4.30328	4.1724	3.64127	3.14689	2.04552	1.01233	3.96313	3.85645	3.74109
XS09G0091500.1	4.08639	2.66951	3.38602	3.4116	4.1687	3.67166	3.39653	4.14865	3.842	4.27915	3.87353	3.42725	5.65516	4.68438	4.14114	3.88788	5.31025	4.30924	4.88939	5.98244	3.64507	6.6223	5.85742	4.51276	6.7463	7.00101	6.67721	5.84059	6.2797	6.09928	6.05976	3.30668	3.17733	3.13162	3.54802	4.38085	4.24841	3.77673	3.39034	3.76859	3.5841	2.44065	4.18911	1.07728	1.4074	4.46874	2.69574	3.32792	3.6264
XS04G0087100.1	3.93762	4.07075	3.87922	3.92078	3.92222	3.89363	4.12343	4.5965	4.52485	4.1451	4.424	4.81499	4.25154	4.8886	4.28008	4.73001	4.0696	3.98797	3.9274	3.80239	5.12933	4.12218	4.35159	4.27003	4.21971	3.7856	4.1567	4.39765	4.9373	4.63149	4.78515	4.81241	4.55822	4.96462	4.4133	4.27626	3.88908	4.74386	5.01969	5.27293	5.15711	4.84144	4.47064	4.10777	3.73938	2.00038	3.31781	3.59825	3.57714
XS10G0118400.1	0	0	0	0	0	0	0	0	0	0	0	0	0	0	0	0	0	0	0	0	0	0	0	0	0	0	0	0	0	0	0	0	0	0	0	0	0	0	0	0	0	0	0	0	0	0	0	0	0
XS08G0092500.1	2.19946	2.59252	2.40176	2.47005	2.57885	2.62863	2.17089	2.09566	2.15923	2.19125	2.13761	1.87014	1.70792	1.81801	1.88962	2.11587	1.25653	2.34554	1.70769	1.11451	1.02539	0.685248	2.25338	2.18211	1.57243	0.798882	0.417557	0.747385	1.12214	1.12175	1.02847	2.06128	2.22434	2.13331	2.21201	2.03015	1.96494	2.03287	1.80923	2.36065	1.89818	2.0214	1.71859	1.39424	1.02598	0.63272	2.69178	2.81631	2.56542
XS08G0092800.1	2.50607	2.71822	2.65656	2.8383	2.40501	2.59328	2.81126	2.70381	2.36259	2.29925	2.46967	2.28268	2.64726	2.55301	2.62049	2.421	2.13358	2.39185	2.24985	2.16132	2.2456	2.08636	2.59767	2.38268	2.29432	2.27298	3.0725	2.62309	2.0961	2.16564	2.61159	2.75974	2.59157	2.84996	2.98225	2.60954	2.83785	2.78318	2.73229	2.61646	2.6649	2.50255	2.58546	2.47274	1.34773	1.43395	1.85001	2.00294	1.93083
XS03G0121400.1	2.3906	2.46112	2.40999	2.54238	2.65769	2.47641	2.62324	2.51983	2.52032	2.61652	2.60072	2.41306	2.90866	2.79726	2.68674	2.58265	2.76035	2.5427	2.69192	2.89494	2.59775	3.11882	2.76251	2.62931	3.14073	3.1061	3.14741	2.91116	2.75833	2.60819	2.56686	1.84463	1.93483	1.97129	2.06048	2.05264	2.16901	2.112	2.29092	2.02861	2.14805	2.10389	2.24662	1.67239	1.92462	0.623956	2.27049	2.39388	2.42631
XS03G0118600.1	1.45067	1.20567	0.763079	0.974274	1.10427	1.50419	0.689381	0.7164	0.999816	0.228916	0.163567	1.2723	0.0730252	0.117798	0.324126	0.254745	0.0323691	1.14915	0.503853	0.0138247	0	0.0300499	1.108	1.36448	0.120556	0.0188067	0.0470264	0	0.13292	0	0.243557	2.58649	2.71271	1.9239	1.13106	0	1.38364	0.295245	0.677889	0.58407	0.267428	1.97449	0.101597	0	0	0	2.01413	1.7009	1.66542
XS08G0099700.1	0.326153	2.63487	3.33992	2.4905	3.72146	2.70933	3.39194	0.104293	0.0221773	0.130361	0.0209732	0.347213	3.63896	3.2519	0.059117	0.13113	0.0276641	0.0404101	0.0561301	0.156265	0	0.133557	0.199643	0.00959548	0	0.146383	2.79188	2.13955	0	0	0	0.388571	0	0.258082	0	0.142434	0	0	0	0	0	0.449091	0	0	0	0	0.0826031	0.0342971	0.101001
XS15G0040200.1	3.28243	3.15802	3.17519	3.36192	3.44035	3.25202	3.154	3.03063	2.77452	2.73839	2.61195	2.98312	2.73866	2.53731	3.02102	2.82486	2.48301	3.02093	2.77703	2.25404	2.33934	2.12838	2.52574	2.96577	2.50534	1.976	1.69856	2.02344	2.2969	2.5908	2.38191	2.78494	2.72389	2.91138	3.01251	2.73623	3.14457	2.43133	2.7595	3.16225	3.07553	3.30591	2.99891	2.69897	2.2023	1.77853	3.49534	3.4765	3.07805
XS10G0114900.1	0.816694	0.0999238	0	0.341505	0.0753125	0.279166	0	0	0	0	0.208532	0	0	0	0	0	0	0.0249596	0	0.0565505	0	0	0.175789	0	0	0.953515	0	0	1.96989	2.27044	1.13289	0	0	0	0	0	0	0	0	0	0	0	0	0	0.0644798	0	0	0.0325166	0
XS07G0182500.1	1.08735	0.184628	0.621446	0.350072	0.496735	0.261035	0.317688	0.12627	0.0851276	0	0	0.284722	0.253616	0.200773	0.0623561	0.0475484	0	0.013946	0.020697	0	0	0	0.439402	0.241538	0.0224377	0	0.0275163	0.0374348	0	0	1.52622	1.36277	2.0837	3.11057	0.268096	0.303254	0.0659095	0.306508	0.0739092	0.478934	3.67148	1.53028	0.352007	0.565228	0.29873	0	0.0812309	0.0239958	0.0771132
XS14G0113600.1	3.55476	3.14519	3.02481	3.39911	3.58147	3.38354	3.32255	2.89401	2.26156	3.04683	2.67716	3.3266	3.38067	3.15972	3.33405	3.13104	3.1847	3.02882	3.15984	2.67119	3.0751	3.05141	3.66662	3.54672	3.05777	2.89595	2.85837	2.98396	2.56865	2.39249	3.33139	2.99241	2.99773	3.15994	2.96888	2.62277	3.02592	2.78427	2.60808	2.40899	3.09482	2.92578	2.57239	1.73631	1.79461	1.36997	3.65573	3.37897	3.46217
XS13G0220600.1	3.44543	3.10231	3.33039	3.15939	3.2302	3.32409	3.41146	3.4929	3.77818	3.50791	3.58951	3.57316	3.83893	3.63889	3.66809	3.48849	3.80665	3.47379	3.45029	3.85632	3.49141	3.97779	3.90562	3.65579	4.05818	3.9168	4.01342	3.91899	4.12265	4.12838	4.13426	3.51192	3.43624	3.63201	3.61435	3.68352	3.64512	3.68458	3.72995	3.95791	3.31318	3.43668	3.80653	2.53554	1.69945	3.07348	3.36981	3.10848	3.25438
XS04G0084500.1	3.27556	2.4835	2.35747	2.72361	3.17559	3.0145	2.38	1.69385	1.45882	1.43051	1.47699	2.95542	2.14669	2.2561	1.32095	1.39342	0.762435	3.11012	3.2035	0.885353	1.07393	0.9044	2.97685	3.11312	1.04155	1.17497	2.12251	1.76507	2.50547	1.92635	2.73054	4.06509	3.75701	3.47323	3.20933	2.50235	3.36802	2.55697	2.70718	2.26121	2.91522	3.79389	1.83711	2.65127	2.22553	0.340887	3.48906	3.78895	3.25401
XS13G0220100.1	5.00792	4.85966	4.51104	4.91543	4.78376	4.95414	4.62322	4.28218	4.05474	4.0312	3.99299	4.58544	4.44018	4.39394	4.04695	4.1012	4.09619	4.65785	4.64151	3.91793	3.84599	3.95593	4.67271	5.03028	4.27338	4.20918	3.87096	3.92131	4.02534	3.72582	3.52666	5.08442	4.95518	4.51473	4.70155	4.55899	4.83444	4.4585	4.63263	4.6281	4.47679	5.02067	4.48909	3.88147	4.33027	3.47304	4.91662	5.00852	4.50433
XS05G0164600.1	3.38363	3.20078	3.1273	3.41273	3.11686	3.21025	3.48355	3.88855	3.56265	3.65223	3.25218	3.6272	4.53751	4.70316	4.13438	4.01432	3.97529	3.41466	3.43676	3.63117	4.21047	3.99384	3.98421	3.75035	4.02521	3.21183	4.58628	4.7142	3.76856	4.46804	4.20982	4.0766	3.96165	3.82404	4.01111	3.49571	3.83939	3.62009	3.77888	3.80722	3.44535	2.8051	3.75328	2.35792	1.50008	2.68223	2.75602	2.79597	2.72293
XS04G0084600.1	1.66568	1.88463	1.93749	2.04983	1.72113	1.89815	2.16362	2.04096	2.4071	2.92148	3.17369	2.30913	1.81784	1.76581	2.18188	1.85527	2.39658	2.05931	1.80245	1.87252	1.03773	1.7924	1.62682	2.15383	1.7827	1.44017	1.81509	1.49438	1.91288	2.02539	1.39564	2.44781	2.35517	2.287	1.88888	1.17375	1.87777	1.4699	1.61473	1.91134	3.23835	2.44993	2.89016	1.71917	0.928981	0.681703	1.78877	1.88636	1.85136
XS08G0091300.1	0	0	0.042207	0	0.043747	0.0165464	0	0.302513	0.117976	0.264455	0.261518	0	0.110005	0.0143075	0.249703	0.107864	0.435369	0	0.0536052	0.0600252	0	0	0.0187056	0.0821958	0.199016	0.0428503	0.0382231	0.0640418	0	0	0	0	0	0	0	0.0975586	0	0	0	0	0	0	0	0	0	0	0	0	0
XS12G0197500.1	3.31821	3.05016	2.88242	3.30253	3.32418	3.22174	3.11634	3.16155	3.09829	3.26267	3.05903	3.37027	3.62817	3.5289	3.26213	3.23111	3.28952	3.40698	3.3852	3.34006	3.20713	3.33235	3.6036	3.43371	3.65094	3.52253	3.46223	3.54708	3.73354	3.97304	3.91078	3.69513	3.53699	3.39932	3.36155	3.49541	3.72123	3.70642	3.54252	3.90474	3.35327	3.46687	3.85536	2.28556	2.31163	4.26424	3.26346	3.34056	3.40096
XS12G0205800.1	0.0205083	0	0	0	0	0	0	0	0	0	0.0159865	0	0.0612657	0	0	0.0180671	0.018383	0.0469653	0	0	0	0	0	0	0	0.0733332	0	0	0	0	0	0	0	0	0	0	0	0	0	0	0	0	0.148609	0	0	0	0	0	0
XS05G0162400.1	0	0	0	0	0	0	0	0	0	0	0	0	0	0	0	0	0	0	0	0	0	0	0	0	0	0	0	0	0	0	0	0	0	0	0	0	0	0	0	0	0	0	0	0	0	0	0	0	0
XS10G0121900.1	3.95396	4.33815	4.28106	4.88769	4.54203	4.42577	4.70941	3.80317	3.79296	2.43947	3.42727	3.88154	3.7683	3.63137	2.55306	3.56053	0.782873	3.10671	2.70065	0.576198	3.23561	0.419983	2.60544	3.60587	1.02635	0.691809	2.64417	2.62227	2.95699	2.73594	3.41075	3.55197	3.32439	4.23773	4.12133	4.13798	4.02945	2.90157	3.39682	3.15044	0.19043	1.65907	3.40028	0.513185	0.774318	0	3.64388	3.97971	4.23081
XS08G0099500.1	3.94092	3.85565	3.85566	3.93215	4.06199	3.90557	4.00805	3.51263	3.48172	3.72948	3.80656	3.7586	4.34494	4.10432	4.04976	4.0787	3.64391	3.70271	3.63616	3.38216	3.63505	3.51641	3.70499	4.03369	4.0249	3.52564	3.34817	3.35118	3.3628	3.46216	3.48061	3.32113	3.40626	3.45967	3.27479	3.30398	2.97878	2.63943	2.71519	3.04063	3.88365	4.0919	3.78142	3.33405	3.18809	3.07958	3.8567	3.80353	3.79105
XS12G0212100.1	0.77764	0.272516	0.169924	0.346469	0.476292	0.3897	0.0276148	0	0.0326756	0	0	0.0927988	0.0267503	0.0911047	0.23511	0	0.0891766	0.303055	0.28581	0	0	0	0.619792	0.549862	0	0	0	0.0806493	0	0	0	0	0	0.132388	0	0	0	0	0	0	0	0	0	0	0	0	0.432251	0.802934	0.538746
XS08G0090800.1	3.20345	4.69571	4.59359	4.87396	5.50386	4.90165	5.35481	1.21962	0.867253	1.19111	1.05027	2.30258	4.80628	4.73558	0.536731	0.590084	0.347311	3.08607	3.25579	0.527091	0.812659	1.05024	3.07087	3.25212	0.744375	0.557502	3.05327	2.98924	2.63296	1.58264	0.960558	2.24208	2.64175	2.50613	3.5322	5.05	4.11809	4.25925	4.14989	2.05895	0.74551	1.10269	2.79905	0.0810702	0.299183	0	1.9048	2.74229	3.132
XS02G0166300.1	2.10734	2.07769	1.97232	1.9566	2.30512	2.17126	2.20629	1.60218	1.81017	1.82231	1.58516	1.92104	1.88435	1.90687	1.94614	1.61665	1.55957	1.84185	1.76836	1.34614	1.81516	1.38273	1.84	1.87955	1.27411	0.959122	0.786191	1.59162	1.4608	1.90387	1.83471	2.51715	2.14075	2.35261	2.10957	1.66333	1.97493	2.06015	1.83912	1.79822	2.21322	2.1249	1.71944	1.61757	1.44149	1.92582	2.23566	2.07678	2.13209
XS01G0100000.1	3.50064	3.69642	3.74814	3.84239	3.75028	3.82039	3.80126	3.87399	3.90447	3.71354	3.57006	3.92274	3.68959	3.9257	3.78796	3.78637	3.70179	3.65664	3.68011	3.64242	3.86061	3.45116	3.78845	3.68446	3.59473	3.23395	3.28896	3.71229	3.56133	3.77842	3.73868	3.93375	3.86897	3.68237	3.60048	3.49274	3.50961	3.1536	3.55922	3.7177	3.76628	3.58876	3.45383	3.25719	3.26579	2.13528	3.4955	3.79873	3.57918
XS10G0117200.1	0	0	0	0	0	0	0	0	0	0	0	0	0	0	0	0	0	0	0	0	0	0	0	0	0	0	0	0	0	0	0	0	0	0	0	0	0	0	0	0	0	0	0	0	0	0	0	0	0
XS02G0164800.1	3.94591	4.22296	3.9856	4.14789	3.96536	4.17947	4.1845	3.70697	3.75567	3.43637	3.45617	3.86601	3.96213	3.87457	3.68853	3.6201	3.34777	3.77608	3.6682	3.13336	3.63594	3.14664	3.84062	3.84063	3.13269	2.74117	3.41423	3.65986	3.0957	3.09216	3.50731	4.25788	4.15227	4.22012	4.08364	3.80594	3.91928	3.81044	3.93763	3.9038	4.10715	4.16991	3.65763	3.61789	2.61281	1.51251	3.82991	3.84785	3.78119
XS04G0092400.1	3.51511	3.78953	3.79644	3.55548	3.81169	3.82146	3.67395	3.67466	3.94396	3.79747	3.57808	3.67143	3.94786	3.95844	3.66567	3.73198	3.42663	3.72634	3.60551	3.36863	3.6048	3.27637	3.68457	3.74714	3.49798	3.06965	3.06249	3.28224	2.10187	1.95014	2.46583	2.45892	2.58705	2.48196	2.62984	2.11654	2.3244	2.02732	2.11662	1.82033	2.57661	2.41201	1.69052	1.54549	0.982037	1.25599	3.68689	3.70053	3.71794
XS02G0162500.1	5.83833	6.07507	5.74861	5.87986	6.00605	6.02606	6.06144	5.24956	5.05152	4.16728	4.57281	5.25713	5.3914	4.97746	4.18972	4.70705	3.22532	5.32149	5.43475	2.72033	4.49234	2.43469	5.02177	5.33011	3.34	2.54081	2.62435	3.34592	2.23933	2.86196	2.85445	4.85705	5.12314	4.62119	4.77452	3.63287	4.221	3.05383	3.54352	3.74456	3.74792	4.77423	3.24492	3.728	3.60229	3.31018	6.04548	6.26247	5.79427
XS14G0113300.1	0.0379099	0	0	0.10044	0	0	0.0483663	0	0	0	0	0	0	0.116613	0	0	0	0.0341321	0	0	0	0	0	0	0	0	0.0613378	0.0118726	0	0	0	0	0	0	0	0	0	0	0	0	0	0	0	0.30513	0	0	0.109272	0	0.050721
XS10G0120200.1	2.78175	2.75258	2.42496	2.13498	2.59608	2.79055	2.30781	1.37269	0.926211	0.818984	0.909107	2.37669	1.90194	1.76047	1.40141	1.39833	1.08543	2.63835	2.25126	0.668623	1.1838	0.385128	2.43662	2.8395	0.986953	0.530089	0.810007	0.976101	0.761095	1.04617	0.957492	2.40878	2.56852	2.32304	2.15227	1.78461	1.95399	1.48792	1.73966	0.930317	1.78554	2.56685	2.03886	1.50645	0.610868	1.10786	2.96861	2.8043	2.50288
XS05G0167000.1	2.8891	2.45663	1.71341	2.03331	2.57114	2.64771	1.64092	1.462	1.04281	0.486408	0.754174	2.27911	1.29285	1.28891	0.719358	1.04457	0.267915	2.09998	1.80741	0.222107	0.559379	0.123234	2.19173	2.1004	0.57124	0.252624	0.128648	0.260027	0.0925655	0.527905	0.164244	2.07681	1.92201	1.16697	1.01523	1.73757	1.34437	1.61909	1.17116	0.264315	0.488152	1.47681	0.487461	0.240182	0.15144	0.425406	2.68005	2.85886	2.30703
XS15G0055900.1	0.328601	0.0420951	0.904292	0.0692312	0.0927988	0.366252	0.852253	0.819303	1.05053	1.45768	0.5871	1.27183	1.29054	1.42272	1.16877	0.801218	1.52489	0.963845	0.699664	1.42656	0.750511	3.40432	0.949925	1.0597	2.3898	2.52464	1.65059	2.33461	1.29958	0	0	0	0	0	0.689407	0	0	0	0	0	0	0	0	0	0	0	0	0	0.600922
XS15G0056000.1	3.31224	3.55524	3.33367	3.58136	3.58384	3.48085	3.38971	3.01029	2.80053	2.77548	2.62293	3.10939	2.86354	2.98552	2.83294	2.77652	2.55961	3.13023	2.87973	2.29593	2.64961	2.33851	3.29764	3.18701	2.66865	2.13914	2.37561	2.63178	3.14968	3.09226	3.10499	3.76038	3.7851	3.39441	3.2195	2.80923	3.05533	3.12057	3.24364	3.47196	3.2479	3.28998	2.84281	3.14873	2.40738	2.87466	3.85592	3.82032	3.61128
XS02G0166100.1	0	0	0	0	0	0	0	0	0	0	0	0	0	0	0	0	0	0	0	0	0	0	0	0	0	0	0	0	0	0	0	0	0	0	0	0	0	0	0	0	0	0	0	0	0	0	0	0	0
XS02G0162900.1	0.239417	0.0458821	0.0800132	0.045435	0.0505467	0.13025	0.0527376	0	0.067934	0.133915	0	0.278083	0.106624	0.196842	0.0489974	0.15295	0.0867616	0.0583296	0.155734	0.094283	0.0534953	0	0.122216	0.0427667	0	0.101854	0.0766783	0.0505889	0	0	0.0609747	0	0.0632555	0.609605	0.187074	0.10863	0.0500303	0	0	0.129037	0.15855	0.503443	0	0	0.0398474	0	0.0257668	0.142213	0.0873632
XS10G0121000.1	0	0	0	0	0	0	0	0	0.0393371	0	0	0	1.83158	1.00831	0	0	0.0442054	0	0	0	0	0	0.786444	0.0410991	0.24351	0	0.993888	0.858016	0	2.28157	2.0633	0	0	0	0.381152	0.207221	0	0	0	0.343397	0	0	0	0	0	0	0.0129659	0	0.0643185
XS08G0091000.1	3.88998	2.85394	2.29187	2.23761	3.00103	3.67367	1.86504	0.355776	0.176444	0	0	3.32836	0.278436	0.514165	0	0.154516	0.0823115	3.82924	3.73038	0.15849	0.465904	0.293471	4.07468	3.94285	0.413606	0.0452047	0.124353	0.243662	0.231069	0.588754	0.647127	5.42524	5.21864	3.7323	3.62093	1.30964	1.31305	0.686244	1.15891	1.62412	0.236735	4.49785	1.01173	0	0.261152	0	4.50095	4.68522	4.17402
XS15G0045500.1	0	0	0	0	0	0	0	0	0	0	0	0	0	0	0	0	0	0	0	0	0	0	0	0	0	0	0	0	0	0	0	0	0	0	0	0	0	0	0	0	0	0	0	0	0	0	0	0	0
XS11G0093000.1	4.20109	4.06639	4.07594	3.87763	3.89141	3.8122	4.34736	3.80125	3.51641	3.0793	3.50092	3.37801	4.55789	3.60063	2.754	2.90694	3.29998	3.25292	3.42265	3.68483	3.47724	3.27287	3.5164	3.1734	3.6477	3.74893	3.46011	3.44043	3.50663	2.71702	2.20242	2.29857	2.57905	2.25787	1.55161	1.02617	0.724735	1.23151	1.03033	1.91226	3.48918	1.09431	0.846276	0.667547	0.140283	0.0849301	3.29076	2.98282	3.59908
XS01G0097900.1	6.14198	4.7834	4.80224	4.11355	4.70097	4.91841	4.07439	4.50357	4.08429	3.88868	3.18758	4.90022	4.93982	4.52127	3.48199	2.8854	3.69008	5.41289	5.38353	3.43182	2.89224	3.33297	5.34847	5.35192	3.86891	3.1659	3.66542	3.95024	3.87252	4.73905	4.50384	3.82507	3.96108	3.94702	3.18572	3.11294	3.21378	3.39741	3.28141	2.90966	4.04524	4.19578	4.69999	2.13386	1.04517	0	6.52402	6.38306	5.49892
XS09G0090500.1	4.63239	4.75109	4.38648	4.4742	4.80135	4.85532	4.21832	3.8173	3.38349	3.36629	3.35957	4.53191	4.16718	4.56269	3.59313	3.98706	1.80293	4.56628	4.66362	1.70981	3.87129	1.08044	4.46517	4.93756	2.10249	0.821584	1.66138	2.98354	1.5494	1.71054	2.07231	3.69624	3.66646	3.16996	3.45134	2.00612	1.97472	1.59087	1.17219	1.16148	0.680563	2.51671	1.96824	0	0.881602	1.63002	5.1183	5.38012	4.9977
XS08G0091700.1	2.19181	2.47488	2.27517	2.31087	2.43836	2.45953	2.41323	1.89851	2.01852	2.01938	1.82544	2.16765	2.08496	2.16417	1.73023	1.88436	1.14151	2.15115	1.51211	0.802166	0.884555	0.671342	2.22138	2.01304	1.43778	0.617287	0.606224	1.00626	0.899447	1.0471	1.02535	2.18639	2.1411	2.27466	2.04018	2.12586	1.96076	1.99322	1.94423	2.19631	2.07085	2.20887	1.72215	1.54024	1.15941	0.533023	2.6487	2.75829	2.91176
XS03G0120700.1	3.80578	3.44059	3.49936	3.22677	3.33545	3.58597	3.53642	3.80462	4.32538	4.34347	4.46038	4.13566	3.54996	4.17308	4.34094	4.5289	3.92942	4.09971	4.06036	4.14523	4.445	3.92146	3.86524	4.00935	3.92682	3.67112	3.48597	4.01436	3.71954	3.66692	3.60505	3.49437	3.29352	3.32421	3.29717	3.10147	3.25677	3.74142	3.73059	3.8139	3.14584	3.21988	3.21718	2.78765	2.3175	2.63777	3.56796	3.61492	3.62781
XS12G0205500.1	0.0546703	0.0389046	0.149781	0	0.0797645	0.0854787	0.126103	0	0.0376165	0	0.0980646	0.0312767	0.0464003	0.1392	0.16469	0.235219	0.133753	0.148409	0.0529517	0.133958	0.159885	0.317744	0.0613704	0.0855328	0.181247	0.216221	0.0532652	0.173544	0	0	0	0	0.101442	0	0	0	0	0	0.0158714	0	0	0	0	0	0	0	0.165784	0.0891872	0.086967
XS09G0084200.1	3.36073	3.61845	3.12201	4.02237	3.88799	3.77022	3.37	2.55042	2.36229	2.72641	2.51852	3.25344	3.16307	3.00698	2.77397	2.8815	2.5423	3.50288	3.28807	2.22646	2.56399	2.3196	3.41494	3.62163	2.84766	2.4137	2.08892	2.36267	2.88367	2.26539	2.45781	2.85546	2.77834	2.87655	2.85774	2.52098	2.63337	2.16091	2.14121	2.14837	2.43042	2.9989	2.64815	1.14021	1.52563	0.788404	3.51262	3.9675	4.23224
XS02G0169300.1	2.98084	2.81056	2.92729	2.79667	2.72174	2.84638	3.27572	3.16919	3.45922	3.18001	3.37304	3.22626	3.52916	3.6071	3.44149	3.48153	3.37344	3.16924	3.19318	3.0951	3.50139	3.25132	3.23291	3.1986	3.28449	3.03523	3.22674	3.41845	3.30556	3.31871	3.36268	2.93327	3.09757	3.00702	3.13641	3.08514	2.98243	2.96211	3.0501	3.21774	3.24079	2.98653	2.62689	1.91715	1.60176	1.63288	2.5237	2.69725	3.04954
XS05G0172500.1	4.97509	4.85899	5.0008	5.21219	5.05449	5.03556	4.99288	5.36207	5.2739	5.59376	5.42198	5.14904	5.59062	5.4371	5.44886	5.18029	5.78731	5.32891	5.44916	5.94789	5.41857	6.11902	5.49328	5.1088	5.68227	5.6469	6.02345	5.86923	5.61352	5.37555	5.68304	5.01047	4.98412	4.62374	4.71325	4.93762	4.95847	5.22597	5.35278	5.56484	4.64422	4.63176	4.7967	4.25961	4.33175	3.22026	4.83265	4.76444	4.73975
XS01G0098800.1	3.64541	3.88682	3.81006	3.79512	4.08681	3.75793	3.87502	3.67881	3.65449	3.59528	3.64931	3.46679	3.59474	3.76983	3.50484	3.2132	3.31924	3.31143	3.31091	3.44952	3.46019	3.19774	3.29389	3.35255	3.12178	2.59384	2.83558	3.36157	2.67187	2.43624	2.68703	2.87633	2.93323	2.99328	2.60983	2.56132	2.35796	2.50225	2.49399	2.58493	2.71915	2.97973	2.6099	2.08526	1.5462	1.34013	3.91215	3.78887	3.99891
XS12G0209700.1	2.33304	2.05461	2.38927	2.15539	2.20532	2.24995	2.6148	2.84333	3.19888	2.93417	3.38909	2.78279	2.913	2.99913	3.23708	3.24997	3.28146	2.84581	3.06533	3.50912	2.96941	3.25588	3.23899	2.97875	3.62047	3.91321	3.39351	3.45266	3.33589	3.68838	3.40244	2.98768	3.15198	3.02335	3.22862	3.42167	3.29692	3.15965	3.33931	3.28387	3.25138	3.22925	3.28096	2.76865	2.77317	3.05396	2.07388	2.19366	2.18429
XS15G0041000.1	2.33013	2.20126	2.22448	2.2811	2.16118	2.27569	2.35941	2.09761	2.36888	2.29581	2.33499	2.45248	2.62775	2.65129	2.47297	2.45547	2.23114	2.25337	2.08453	2.14612	2.51041	2.18221	2.46074	2.3514	2.49317	2.1626	2.26155	2.54707	2.38488	2.59641	2.60085	2.48926	2.35792	2.65487	2.41671	2.40337	2.41199	2.48091	2.39811	2.86326	2.24272	2.53205	2.56175	2.12813	1.66382	2.3412	2.09139	2.03067	2.07172
XS15G0045200.1	2.6616	2.42806	2.27619	2.39072	2.63717	2.5946	2.66736	1.90736	2.07667	2.16588	2.3234	2.52918	2.8908	2.74559	2.44665	2.37376	2.43659	2.58637	2.37655	2.30682	2.31423	2.47957	2.55772	2.73168	2.56903	2.42947	2.45357	2.58558	2.25884	2.18129	2.30163	2.24564	2.57358	2.45738	2.28087	2.01581	2.36598	1.63241	1.95945	2.30245	2.31493	2.174	1.96302	1.76432	1.2643	1.75066	2.43847	2.49735	2.64657
XS01G0100600.1	0.927846	0.157661	0.921578	0.19978	0.476164	0.218675	0.704595	0.0513013	0.228759	0	0.0278839	0.61267	0.869057	1.0136	0.0866265	0.026554	0.12121	0.125673	0.294833	0.102694	0.064731	0.803798	0.929947	0.828298	0.317247	0.839909	0.797283	0.972308	0.325315	0.545362	0.916084	0.28377	0.29812	0.838211	0.148125	0	0	1.71791	0.152531	0.160286	1.65377	1.4076	0.24423	0	0	0	0.0116294	0.0359336	0.662092
XS15G0038400.1	2.42367	2.19793	2.45617	2.22154	2.44301	2.34731	2.45607	2.22296	1.84717	2.02707	1.75562	2.2429	2.33033	1.97676	2.06668	2.2706	2.09079	2.39189	2.27377	1.7289	1.44825	1.90392	2.19666	2.49309	2.24804	1.87778	1.75802	1.54946	1.92344	1.72415	1.71086	2.49083	2.68973	2.68621	2.39304	2.17969	2.58588	1.48562	1.60541	2.05537	2.94887	2.52045	2.32517	1.38256	2.0373	1.74333	2.55693	2.42808	2.4601
XS01G0100400.1	5.8232	6.32229	6.15095	6.42142	6.82056	6.41916	6.31805	6.03956	5.53979	5.8301	5.12309	6.02073	5.58339	5.89061	5.61067	6.0158	5.3055	6.16446	5.64796	4.95189	4.66988	4.80562	6.51755	5.98106	6.04821	4.57971	3.91573	5.08997	6.57119	6.53365	5.7098	6.00097	6.06452	5.44353	6.21817	6.54039	5.48192	6.24634	5.77443	6.14636	5.40246	6.7391	5.42196	6.2582	6.66883	2.76026	6.22997	6.57593	6.98678
XS15G0043300.1	3.65087	3.73124	3.71749	3.56866	3.44911	3.68969	3.70186	3.84287	4.12284	3.67167	3.76636	3.77548	3.57855	3.74576	3.64857	3.83884	3.36391	3.6989	3.64939	3.34181	3.64394	3.06323	3.61032	3.94054	3.39055	3.00806	3.03471	3.39689	2.95514	2.74373	3.26374	3.5504	3.59539	3.44366	3.28693	2.82598	2.97996	3.17924	3.36047	3.14843	3.02339	3.41703	2.83922	2.79241	1.76217	0.832057	3.58268	3.64059	3.24465
XS13G0223400.1	4.27343	4.20477	4.25065	4.36688	4.26939	4.36699	4.35604	4.25908	4.34128	4.28808	4.28059	4.40271	4.54794	4.52744	4.4048	4.33429	4.37815	4.32763	4.26009	4.23767	4.31828	4.36085	4.49268	4.52156	4.51232	4.25669	4.21378	4.39234	4.23039	4.25073	4.29403	4.47641	4.58008	4.65184	4.5425	4.41567	4.64083	4.3303	4.35276	4.55316	4.40207	4.52697	4.38842	3.85178	3.3486	4.03085	4.17046	4.13889	4.07516
XS12G0199800.1	1.75623	1.34156	0.999176	1.89363	1.69493	1.84338	2.08364	1.57561	1.14476	1.73587	1.50346	2.33345	1.86177	1.65452	1.39083	1.92867	1.51301	2.14408	2.21869	1.56944	2.05826	1.98571	1.55922	1.82691	1.48532	1.89069	1.77871	1.72146	1.95403	2.09237	1.91552	2.64635	2.27534	2.12644	2.02268	1.62622	2.34985	1.95329	1.66837	2.24129	1.57293	2.40213	2.15538	1.60541	1.67271	1.30978	1.3617	2.2404	2.16702
XS05G0172700.1	3.96148	4.17779	3.6529	3.95767	4.08793	3.99257	3.62969	2.88709	2.38376	2.18494	1.98894	3.11232	2.33481	2.4971	2.45539	2.49856	1.92564	3.34777	3.0489	1.93727	2.19935	2.14002	3.33468	3.636	2.44178	1.92622	1.43833	1.61583	1.84618	1.59138	1.5153	3.16019	3.07121	3.01675	2.59066	1.92017	2.3985	1.89889	2.01769	2.49819	2.58763	3.00693	2.19739	2.37354	2.41563	1.43382	4.97396	4.74299	4.61926
XS12G0200300.1	6.90776	7.05917	7.01812	7.06431	7.02428	6.84455	7.04236	7.29284	7.14275	6.69039	6.83437	7.02749	6.55503	6.82022	6.58989	7.07006	6.92454	6.66315	6.6459	6.75566	6.59926	6.58487	7.1331	6.75735	6.84233	6.66573	6.85651	7.04614	7.73306	7.3925	7.51544	7.68235	7.49204	7.72614	7.60924	7.75301	7.37921	7.47988	7.55647	7.51874	7.5664	7.74936	7.58814	7.02661	6.67367	5.22414	6.55958	6.75187	6.72512
XS05G0165800.1	5.28453	5.16578	5.34493	5.20454	4.97665	5.06679	5.23803	5.68086	5.80079	5.66178	5.64598	5.51931	5.19734	5.69425	5.86949	5.54496	6.09897	5.73025	5.9466	6.25248	6.02614	6.0095	5.19683	5.53272	5.83665	6	5.71835	5.98112	4.92754	4.70671	4.96005	4.57507	4.73312	4.35283	4.25302	4.69557	4.18072	4.28122	4.4519	4.88332	3.72532	3.9544	4.24402	3.50789	2.99731	3.46455	4.95185	4.88907	4.78499
XS05G0167400.1	2.59221	3.0562	2.97023	3.02549	3.27768	3.06106	2.85426	3.40281	3.56053	3.43733	3.75384	2.88805	3.09573	3.22095	3.44821	3.50391	2.64809	2.76362	2.74278	2.53031	3.173	1.64228	3.24127	3.05007	2.43719	1.71997	2.36446	2.82441	2.10405	2.58335	3.04955	2.62708	2.54989	3.30135	3.08497	2.53039	2.56698	2.99806	3.00316	3.06674	3.34594	2.10955	2.34814	1.70515	0.965941	0.767772	2.21706	2.25748	1.94816
XS10G0119400.1	4.38122	3.90157	3.50473	3.31159	3.27432	3.43947	2.67055	3.23027	3.14111	3.56915	3.07029	3.09448	4.62868	4.20451	3.05332	2.42335	3.2736	2.87918	2.71989	3.94248	1.86336	1.58402	3.36903	2.35669	3.60529	2.61729	4.70672	4.65508	2.36743	2.97465	3.38631	2.85335	2.12803	3.64068	4.00509	3.82297	3.34903	3.54792	4.08623	4.3744	0.36787	1.12821	1.00427	0.420737	0.0985069	1.16619	0.928761	1.80182	2.25321
XS14G0114100.1	7.05355	6.8265	6.71474	6.57342	6.56187	6.78595	6.68876	5.94763	5.8184	5.44679	5.44533	6.44571	6.27609	6.15466	5.77283	5.66086	5.37831	6.61337	6.56748	4.97656	5.61167	5.01955	6.15681	6.69695	5.24747	4.76988	5.58026	5.62607	4.0645	4.20773	4.5024	5.8274	5.99884	5.48283	5.29106	4.90584	5.18006	4.87365	5.06674	5.25616	5.11985	5.63138	4.85279	5.51688	4.90676	4.15309	7.37855	6.99792	7.00676
XS15G0054800.1	3.83487	3.22507	2.94106	2.96753	3.34169	3.42825	2.76822	2.8862	2.90603	3.2598	3.5031	2.89414	3.38583	3.0192	3.58565	3.54368	3.1897	3.39359	3.29597	3.02385	2.25165	2.24107	3.25314	3.78231	2.87842	2.26874	2.31561	2.64969	2.1725	2.66638	2.0903	2.67529	2.23662	2.05921	2.71205	3.36593	2.56187	2.23055	2.24907	1.85573	0	2.36019	2.21813	3.03653	1.94049	2.40045	3.44314	3.34312	2.92558
XS10G0122100.1	3.69836	3.2323	3.90849	3.34792	3.27757	3.3429	3.68022	3.51777	3.71591	3.42775	3.43696	3.46357	4.34209	3.82584	3.6419	3.71601	3.75657	3.6063	3.57276	3.94792	3.43176	3.89898	4.02984	3.71565	4.06727	4.02704	4.24706	4.17947	4.76215	4.95035	4.71036	4.0284	4.01683	3.89824	4.03665	4.72219	4.31608	4.45176	4.37922	4.21022	3.809	4.0114	4.73274	2.8893	2.43595	2.92022	3.6303	3.17221	3.31445
XS05G0161900.1	0	0	0	0	0	0	0	0	0	0	0	0	0	0	0	0	0	0	0	0	0	0	0	0	0	0	0	0	0	0	0	0	0	0	0	0	0	0	0	0	0	0	0	0	0	0	0	0	0
XS07G0180700.1	0	0	0	0	0	0	0	0	0	0	0	0	0	0	0	0	0	0	0	0	0	0	0	0	0	0	0	0	0	0	0	0	0	0	0	0	0	0	0	0	0	0	0	0	0	0	0	0	0
XS07G0182700.1	2.3875	2.36233	2.34754	3.25872	2.55274	2.55036	2.47261	2.17747	2.14377	1.64266	1.90307	2.44511	2.72402	2.22378	1.58721	2.21617	0.564127	1.23143	1.08961	0.337698	1.78863	0	1.70929	1.38509	0.446642	0.10264	2.12316	2.16538	2.03983	2.38534	2.06345	1.80741	1.51496	1.62338	1.95534	2.62708	2.47407	1.2973	1.6632	1.20408	0	0.454004	1.93103	0	0	0	1.65067	2.19989	2.2305
XS03G0120400.1	3.92446	3.79721	3.76581	3.6271	3.73341	3.77807	3.82243	4.01465	4.17677	4.10023	4.06672	3.91089	4.16565	4.11425	4.01596	3.97537	4.11033	4.036	3.78201	4.17903	4.00156	4.32138	4.00032	3.98566	4.22545	4.23247	4.29689	4.20557	4.11059	4.30938	4.21482	4.10501	4.01764	4.14529	3.97238	3.85907	3.90664	4.12753	3.98737	4.29456	3.48498	3.80422	3.95078	2.91787	1.96967	2.98702	3.86521	3.56331	3.74782
XS03G0118100.1	3.61029	3.52782	3.55528	3.36905	3.336	3.51716	3.52215	3.43222	3.50181	3.1754	3.18536	3.42109	3.63206	3.50344	3.31513	3.30385	3.30915	3.4742	3.43401	3.28937	3.25702	3.37585	3.65301	3.4925	3.44346	3.31358	3.67031	3.53562	3.59505	3.71264	3.717	3.52134	3.45717	3.49133	3.39208	3.2938	3.32283	3.42628	3.5002	3.60074	3.4096	3.63985	3.43919	2.92455	2.88752	2.81173	3.6163	3.5156	3.42981
XS05G0169900.1	1.12649	1.29402	0.968406	1.00733	1.56285	1.40509	1.18698	0.404354	0.383577	0.617336	0.179952	0.897155	0.949726	0.655515	0.636952	0.598777	0.308369	1.12152	0.966442	0.0664645	0.43983	0.277779	0.972587	1.51269	0.475412	0.37957	0.0583173	0.354941	0.206015	0.229401	0	1.03012	1.12335	2.06435	1.80558	1.39675	1.68653	0.486729	0.769295	0.685228	1.91649	1.23116	1.54994	0.652101	0.391886	0.368706	1.2208	1.10885	1.26087
XS06G0193600.1	3.73903	3.63856	3.62744	3.30161	3.09687	3.43704	3.21198	3.741	3.90829	3.40831	3.61758	3.29075	3.17031	3.34417	3.04393	2.94641	3.23609	3.54633	3.58451	3.72926	2.89502	3.57536	3.43521	3.19169	3.44979	3.38622	3.89486	4.00224	3.21764	3.13401	3.27804	2.84379	2.87334	2.56107	2.85789	3.21344	2.65926	3.77041	3.69132	3.53108	3.12681	2.71151	3.06478	2.39863	1.84848	1.18361	3.22242	3.53051	3.26131
XS05G0163600.1	0.0349675	0	0.242651	0	0	0	0.0417243	0.0758057	0.0493227	0	0	0.0973762	1.16348	0.52077	0.51857	0.123876	0.534638	0	0	0	0.290196	1.21391	1.05736	0.388959	0.871957	0	1.55249	1.56994	0	2.51573	1.84734	0.0568084	0.120557	0.0608524	0.573573	2.07872	0.0471669	0.050542	0.0538962	1.25961	0.570204	0.112877	2.67044	0.152026	0.0404267	0.0944908	0.169736	0	0.0732601
XS05G0165600.1	2.71297	2.71037	2.55133	2.86293	2.75765	2.56005	2.87064	3.27549	3.53613	3.07518	3.35067	3.698	3.57879	3.56513	3.2609	3.23011	3.33678	2.83332	3.06159	3.46288	3.98752	3.80865	3.9614	3.27021	3.80157	3.1731	3.47263	3.76806	5.15956	5.25144	5.32829	3.0409	3.13289	3.20907	3.41688	3.21535	3.33411	3.94119	3.62454	3.56411	3.63275	3.35636	2.53998	2.5928	2.42803	1.26647	2.42844	2.51294	2.81933
XS01G0095100.1	2.56037	2.49964	2.60976	2.42535	2.18198	2.22604	2.37112	2.60105	3.11059	3.30403	3.49318	2.61415	3.30132	3.44528	3.82486	4.36023	3.29169	3.19584	3.28394	3.60558	1.98413	2.78	3.47797	2.9728	3.43748	2.81105	2.7649	3.29144	3.63742	3.60086	3.55244	2.62264	2.51033	2.325	3.45528	6.03476	4.15207	5.93475	5.83321	3.88797	4.48807	3.1664	6.47535	1.04447	1.04181	3.32468	3.0265	3.83328	3.27808
XS15G0042000.1	0	0	0	0	0	0	0	0	0	0	0	0	0	0	0	0	0	0	0	0	0	0	0	0	0	0	0	0	0	0	0	0	0	0	0	0	0	0	0	0	0	0	0	0	0	0	0	0	0
XS12G0209800.1	4.5439	4.49607	4.39495	4.71991	4.53754	4.5615	4.68645	3.91663	3.83347	4.02976	3.7148	4.21783	4.27119	4.45783	4.3502	3.95023	3.87215	4.35483	4.39858	3.83242	4.04824	3.58665	4.2136	4.24636	3.56753	3.56199	3.85556	4.14308	3.71991	3.49944	4.20877	4.50048	4.56483	4.45319	4.31052	4.0014	4.05814	4.2444	3.97455	3.75034	4.99834	4.2261	3.68173	3.57088	3.22332	2.29645	4.18036	4.34344	4.39092
XS03G0120800.1	2.80091	3.322	3.10659	3.39023	3.52374	4.01806	3.67904	4.44118	4.69082	4.98462	4.66056	4.54738	2.25662	4.57633	4.6802	4.93876	3.77812	3.70087	3.69215	3.48991	5.40921	4.41298	3.22592	3.54144	4.2426	3.54678	2.12375	4.01935	1.15453	1.29117	1.08166	1.8598	2.34701	1.71486	1.02921	1.46885	1.80618	1.83564	1.97229	0.774758	0	1.46022	1.19976	2.1893	1.71104	0	2.64918	3.60845	3.54736
XS01G0091500.1	3.6255	2.99272	2.87163	2.97343	3.74703	3.40297	2.11394	1.58771	1.54063	1.33543	1.11303	2.17922	2.67533	2.0224	1.82464	1.6547	2.10977	2.58265	2.35232	1.82708	0.26072	1.64674	2.42092	2.45973	1.97122	1.7185	2.04587	1.81151	1.76935	1.52015	1.8402	2.23069	1.95089	2.17731	1.32948	0.615953	1.04596	1.45605	1.28373	1.87582	3.04027	3.51743	1.02653	2.04332	0.962616	0.373112	3.86701	3.85438	3.39367
XS01G0098700.1	0.0139351	0.330767	0.124619	0.464827	0.321871	0.289043	0.210485	1.42339	2.45008	4.35102	3.75592	2.18435	0.222843	3.55808	4.13477	3.15742	2.33044	3.15952	3.1144	2.24411	3.93922	0	0.595941	1.87486	1.60745	0.180067	0.359765	3.29955	0	0	0	0	0	0	0.357258	0.327929	0.266145	0.152673	0.0558717	0	0	0	0.0533891	0	0	0	0.121089	0.288793	0.124962
XS13G0220200.1	0	0	0	0	0	0	0.177477	0	0	0	0	0	0	0	0.0641469	0	0	0	0	0	0	0	0	0	0	0	0	0	0	0	0	0.194509	0	0	0	0	0	0	0	0	0	0	0	0	0.0754145	0	0.0553502	0	0.0223663
XS12G0200900.1	3.61926	3.32229	3.57476	3.34301	3.25971	3.42548	3.68541	3.94259	4.07779	3.90814	3.72679	3.61818	3.32434	3.52685	4.02285	3.80354	3.96668	3.83536	3.81159	3.8484	3.64742	4.07242	3.89118	3.78383	3.78467	3.82288	3.56932	3.74412	4.40525	4.51893	4.24971	4.15864	4.04749	4.28018	4.08593	3.91725	3.79798	4.1689	4.16767	4.2163	4.12311	3.82234	3.68919	2.89492	1.91249	3.17844	3.25298	3.15699	2.93272
XS09G0089700.1	0	0	0	0	0	0	0	0	0	0	0	0	0	0	0	0	0	0	0	0	0	0	0	0	0	0.0937481	0	0	0	0	0	0	0	0	0	0	0	0	0	0	0	0	0	0	0	0	0	0	0
XS15G0053600.1	2.59231	2.69303	2.35289	2.69426	2.81949	2.82824	2.60837	1.02801	1.41873	1.49434	1.37119	2.54875	1.83044	1.99108	1.98229	1.93667	1.3905	2.74135	2.41725	1.14179	1.55292	1.19513	2.22367	3.03061	1.51935	0.913051	0.68688	1.36602	0.979294	0.78814	0.552485	2.73369	2.46374	2.41496	2.42691	2.07214	2.17144	0.896801	1.91488	1.85596	2.59986	2.22005	1.68141	1.69944	1.03986	0.386345	2.65409	2.70821	2.87129
XS05G0166300.1	5.86252	5.77253	6.0077	5.94838	6.41419	5.83939	5.2582	5.96739	5.82366	5.67374	5.49654	5.53748	6.57467	6.04273	6.15113	5.9165	6.69492	5.83423	6.0847	6.19184	5.22658	5.56237	5.72683	5.87453	6.51371	6.47843	6.87509	6.55024	5.16772	5.39038	5.21744	3.82186	4.09795	3.91982	4.01547	5.1076	4.30384	5.0333	5.38229	5.06791	4.22796	5.43224	5.09766	4.92797	5.09829	4.56607	5.55503	5.78307	5.36368
XS01G0091200.1	3.99153	4.76023	4.70436	4.52652	4.20157	4.36209	4.56516	4.83319	4.8033	4.7163	4.70644	4.47276	3.9602	4.45806	4.66599	4.58	4.41516	4.2268	4.17084	4.20754	4.66043	4.20918	3.75707	4.40879	4.27485	4.1317	3.43926	4.13905	3.0812	2.68573	2.4937	3.11228	3.27514	2.85941	2.91709	2.93121	2.55843	2.48017	2.67084	2.926	2.44853	2.79814	2.2639	2.66274	1.76071	1.20401	4.12923	3.93029	4.19483
XS08G0099800.1	0.277011	0	0.318504	0.160353	0	0	0	0	0	0	0	0	0.228915	0.239431	0	0	0	0	0	0	0	0	0	0	0	0	0	0.0609311	0	0	0	0	0	0	0	0	0	0	0	0	0	0	0	0	0	0	0.0501914	0	0.371641
XS10G0120300.1	3.75286	4.75545	4.69811	4.53346	4.32961	4.33619	4.91356	5.31537	5.23556	4.18496	4.65788	4.85702	5.11346	4.95717	4.19996	4.61856	4.07893	3.90241	3.65774	4.1541	5.1248	4.12663	4.30765	3.74381	4.16626	3.9268	4.19847	4.26838	4.84688	4.8637	5.34235	4.30787	4.26758	4.47087	4.39019	4.6358	4.40376	4.65344	4.61639	4.70555	3.92059	3.95041	4.98859	2.8909	2.46056	3.44239	3.53307	3.21355	3.35236
XS15G0037200.1	0	0	0	0	0	0	0	0	0	0	0	0	0	0	0	0	0	0	0	0	0	0	0	0	0	0	0	0	0	0	0	0	0	0	0	0	0	0	0	0	0	0	0	0	0	0	0	0	0
XS03G0121200.1	0	0	0	0	0	0	0	0	0	0	0	0	0	0	0	0	0	0	0	0	0	0	0	0	0	0	0	0	0	0	0	0	0	0	0	0	0	0	0	0	0	0	0	0	0	0	0	0	0
XS08G0099600.1	2.97744	3.14622	3.13005	3.1066	3.3838	3.27357	3.27076	2.59116	2.6269	2.46339	2.58388	2.99437	3.49517	3.33566	2.57665	2.75123	2.49197	2.96046	2.78669	2.36611	2.5268	2.41165	3.0653	3.27887	2.63088	2.23847	2.89718	2.77549	2.49817	2.59188	2.48945	2.81115	2.94917	3.06941	2.64195	2.30758	2.35882	2.53606	2.63445	2.38478	3.0825	3.10817	2.67497	2.42702	1.78315	2.05111	3.05725	3.13357	3.19753
XS12G0206000.1	0.0441601	0.105626	0.0451595	0	0	0	0	0	0	0.129454	0.0486841	0	0.021603	0.0207675	0	0	0	0.0363692	0	0	0	0.158536	0	0.0423479	0.0924057	0.0840369	0.0293698	0	0	0	0	0	0	0	0	0	0	0	0	0	0	0	0	0	0	0	0.0241383	0.0468251	0.0435492
XS07G0182400.1	3.02593	3.64235	3.5264	3.19521	3.17263	3.4213	3.46024	4.89636	5.18892	4.38646	4.63813	4.61389	2.65466	4.49308	4.5684	4.90732	3.52973	3.78364	3.85445	3.74368	4.83219	3.18228	2.78626	3.58803	2.96606	2.96871	2.25082	3.28821	0.605068	0.855449	1.3162	1.79559	1.87173	2.32464	2.16622	1.61745	1.32127	1.41135	1.19911	0.964763	1.76844	1.68253	1.26602	1.28503	0.535489	0.97437	3.26886	3.26298	3.11078
XS03G0116800.1	1.87472	1.8922	1.96882	2.30652	1.83683	1.91192	2.40437	1.71393	1.60942	1.41229	1.50292	2.21554	2.1649	2.12179	1.70721	1.78705	1.17636	1.6381	1.57758	0.893844	1.7814	1.10406	1.76694	2.02416	1.23754	0.777271	1.62484	1.80068	0.812492	0.702082	1.87578	1.86476	1.43732	2.25934	1.93277	1.62294	1.6653	1.28967	1.49406	1.46062	1.68764	1.49923	1.18867	0.472312	0.243778	0.161987	1.83455	1.93526	2.15744
XS14G0114500.1	4.06657	2.55951	4.51214	2.69647	2.9443	2.63985	3.27865	4.93871	5.86769	4.63005	4.60264	4.30722	5.48814	4.9946	5.59395	5.71604	5.87334	5.07325	5.62302	6.56584	4.42152	5.91119	5.36621	4.84925	6.13492	6.56989	6.15911	6.35718	5.28026	5.12864	5.67651	2.27756	1.63027	2.24087	4.31922	5.65344	4.53582	6.09065	5.69505	4.1054	3.34827	2.07158	5.82659	1.41308	1.42815	2.58293	2.76858	2.37887	2.15003
XS05G0163900.1	0.0259098	0.022891	0.688182	0	0.160185	0.0133028	0.0816752	0.196692	0.21745	0	0	0.211175	2.72315	1.82135	0.992099	0.342026	1.11592	0.0448236	0.0628768	0.0237113	0.615912	1.85585	1.62087	0.956556	1.64892	0	2.8058	2.81189	0.052822	3.69662	3.97838	0.121183	0	0.0403969	0.33681	1.02721	0	0.0391976	0	2.04463	0.156444	0	1.28738	0.0796408	0.176842	0	0.102771	0.0937274	0.0744152
XS05G0165500.1	3.26677	3.14584	3.03191	3.41258	3.47897	3.41371	3.49522	3.17115	2.90514	3.35917	3.02753	3.38352	3.1325	3.20388	3.31921	3.20176	3.39595	3.52329	3.49687	3.30695	3.07106	3.3902	3.81102	3.63735	3.28412	3.22561	3.00921	3.21391	3.97802	3.9748	4.08081	4.72563	4.78426	4.80878	4.76833	4.26912	4.6659	4.21162	4.34023	4.57523	4.48963	4.63556	4.19777	4.10285	3.26544	4.32342	3.20622	3.43186	3.58807
XS01G0097800.1	4.81172	4.00642	3.99811	3.8505	4.53303	4.96726	3.8952	3.82141	3.15682	1.37515	1.9084	4.55942	1.78731	2.11086	1.21792	1.3749	0.587901	4.93832	5.12454	0.872139	2.00942	0.630268	3.82181	4.205	0.564852	0.794454	0.758858	0.689585	0.729341	1.14784	0.411433	4.1098	5.10882	4.49692	4.57817	0.94688	3.39891	0.711336	1.84254	0	2.36513	4.67869	0.953119	1.11305	0.663382	0	4.24099	4.8599	5.58833
XS14G0118500.1	3.67612	3.62531	3.6364	3.47438	3.6954	3.82804	3.76103	3.32934	3.34431	3.10651	3.1109	3.57762	3.74249	3.52821	3.38752	3.30338	3.40149	3.63504	3.43395	3.11549	3.32348	3.21899	3.49153	3.79291	3.2619	2.94294	2.93501	3.24675	2.82237	2.92583	3.22586	3.34263	3.37516	3.53188	3.26259	2.99854	3.35449	3.38183	3.27569	3.42638	3.3373	3.4355	3.17538	2.93813	2.30796	2.7568	3.52205	3.5888	3.58164
XS15G0039000.1	3.86311	4.45964	4.30761	4.27871	4.4048	4.37471	4.21281	4.3914	4.13093	4.77966	4.44475	4.19419	4.29083	4.5043	4.43893	4.53217	4.02976	4.29432	4.0066	3.54218	3.74001	3.56018	4.30028	4.27539	3.60352	2.57288	4.17369	3.97122	3.00797	3.60477	3.13782	5.238	4.84004	4.84754	4.83679	3.77595	4.31498	3.44037	4.24305	3.60203	3.97598	4.80405	3.18519	4.29486	3.00952	0.404133	4.00364	3.95736	4.37979
XS12G0203200.1	2.94517	2.53575	3.00525	2.71224	2.73331	2.77118	3.08872	2.9906	3.23702	2.6888	2.61125	3.21757	2.85816	3.18883	3.05356	3.10796	2.6216	2.70241	2.62193	2.18934	3.20615	2.21895	3.06336	3.07413	2.70492	2.3915	2.16916	2.5045	2.65117	2.8292	2.73872	3.01385	2.89983	2.91301	2.5669	2.61931	2.48282	2.66317	2.35584	3.00707	1.76733	3.02962	2.65115	2.1269	2.3753	2.00006	2.91985	2.86438	2.91954
XS09G0093400.1	4.07916	4.13367	4.31298	4.11331	4.13483	4.19126	4.4692	4.30464	4.42332	4.10356	4.09518	4.3392	4.63825	4.40683	4.05253	4.11333	3.85997	3.88486	3.8795	3.80978	4.24478	3.93817	4.43628	4.1856	3.82029	3.5504	4.04698	4.05465	4.38139	4.74969	4.81473	4.64869	4.57407	4.71411	4.75913	4.59694	4.68522	4.69656	4.81488	5.26054	4.79447	4.62572	4.59142	4.20606	3.6046	3.55216	3.98195	3.9802	4.05753
XS06G0193200.1	1.2212	1.29411	1.59496	1.37179	1.37364	1.06091	1.4366	2.42752	2.36001	1.66139	1.92517	1.78322	1.38387	1.58121	2.53924	2.36913	2.56292	1.79153	2.1762	2.62808	1.8575	1.88128	1.7827	2.59266	3.44315	2.89798	1.78724	1.8567	3.28394	2.64345	2.37739	1.72822	1.71054	1.80217	1.60206	3.28934	2.81534	2.82955	3.30475	3.53177	0.940451	2.695	2.95237	1.77684	1.95593	2.36627	0.966652	1.12971	1.30008
[truncated: 26 more columns]

## Sheet: S3
Data Files S3 The candidate KCS genes expression profile. The expression values were normalized by ln(TPM+1).
Genes	RS_FB	B_DHX	A0_H1_HX	C9_H1_CX	C9_H1_DX	C9_H1_HX	E2_H1_HX	A0_H1_CH	A0_H1_SK	C9_H1_CH	C9_H1_XH	E2_H1_LXH	JH_H1_HL	JH_H1_SH	A0_H2_XH_BH	A0_H2_XH_HU	A0_H2_XH_QH	C9_H2_BH_LXH	C9_H2_LXH_QH	C9_H2_QH_XH	E2_H2_HU	E2_H2_KL_XH	E2_H2_LXH	A0_H3_LXH_LH	A0_H3_XH_LH	C9_H3_XH_LH	JH_H3_BK	JH_H3_HO	C9_1G	E2_1G	A0_2G	C9_2G	E2_2G	A0_3G	E2_3G	E2_4GP	C9_4GP	A0_5GP	C9_5GP	E2_5GP	A0_4GR	C9_4GR	E2_4GR	A0_5GR	E2_5GR	E2_6GR	A0_Y1	C9_Y1	E2_Y1
XS05G0006200.1	5.84632	6.0245	6.01736	5.51886	5.78318	5.66952	5.83661	5.59636	5.71227	5.61921	5.50025	5.97224	6.93056	6.25722	6.3441	6.1877	5.72985	5.70336	5.46731	4.88212	6.78533	3.70946	5.27796	5.48996	4.85766	3.24983	5.31404	5.92972	3.47899	3.51531	3.89909	2.66116	2.71073	2.85574	2.98044	2.57005	1.95713	3.3296	3.26812	3.89616	4.70461	2.75878	0.712807	2.06484	0.331448	0.333694	4.08376	4.09866	4.72824
XS07G0040000.1	2.03828	2.07122	2.20187	2.43926	2.19252	2.22425	2.81083	1.64448	1.90929	1.2451	2.56933	1.78537	3.11154	2.15659	2.04185	2.56321	1.42465	2.06597	2.07021	2.60787	0.849882	2.39168	2.39365	2.49882	2.62345	3.67941	3.96797	3.19892	1.9796	2.28741	1.41037	1.18753	1.22556	1.19986	0.974086	1.6102	1.48791	1.23194	1.50529	1.9913	1.90446	1.09536	1.83217	0.900682	0.586492	1.93116	1.93962	2.21862	1.84956
XS02G0044900.1	3.50004	3.7059	3.74277	3.685	3.65101	4.005	3.83601	3.67599	3.35704	3.38127	3.78552	3.77635	4.21293	3.44593	3.42869	3.55068	3.15861	3.58502	3.66527	3.42543	3.21594	3.05934	3.65818	3.7809	3.40293	3.22736	3.71565	3.61186	3.62109	3.71974	4.02226	3.84672	3.83003	3.7744	3.81003	2.71771	3.36347	3.48361	3.87725	3.23462	4.55256	3.82347	2.70721	3.47875	2.21267	2.50435	3.30732	3.4655	3.33373
XS01G0341200.1	3.38649	3.71961	4.1517	3.61246	3.37565	3.54638	3.68058	4.61668	4.83944	4.75517	4.78886	3.90374	3.47132	4.42074	4.58929	4.5767	5.14531	4.7603	5.12808	5.8119	4.29851	4.83748	3.84553	4.10725	5.16209	5.65478	4.57629	4.99005	3.66938	3.07722	3.75471	2.31485	2.37851	2.74863	2.34121	2.955	1.74448	3.33218	2.78055	2.87903	2.05643	2.49397	2.41957	1.00049	0.381567	0.80511	2.26586	1.83872	2.12313
XS04G0241300.1	3.42824	3.78039	3.69062	3.65153	3.57362	3.62938	3.60674	4.67024	4.81967	4.62484	4.96766	4.70079	3.33998	4.2731	4.09537	4.63345	3.71928	4.10558	4.10813	4.35226	4.60068	3.85793	3.7137	3.61454	3.80692	4.14157	3.34684	4.10153	3.60286	3.04187	3.64117	2.94898	2.71894	3.24293	3.15288	3.04767	2.9314	4.58185	4.07583	3.01848	2.73017	3.14723	2.57096	1.81859	1.19205	0.823805	4.08618	4.02257	4.04713
XS03G0261400.1	3.15849	4.38148	3.78464	4.38013	4.601	4.66557	4.27384	2.21769	1.91806	0.802423	1.09883	3.00587	2.40083	1.65885	0.134836	0.771632	0	3.61096	3.29498	0.0460123	0.386039	0.00996122	2.68628	3.54022	0.150586	0.0178049	0.634587	0.284478	0.0639152	0.10502	0.270323	3.79621	3.98326	3.92934	2.92424	0.289979	2.24512	0.204262	0.675497	0	2.88693	3.7094	0.339146	3.00583	1.90849	0.0623333	3.06908	3.47179	2.97407
XS03G0219200.1	4.36837	5.49623	5.6249	5.1935	4.71709	4.7499	5.41883	6.13032	6.28583	5.47798	6.1633	4.82017	5.63861	5.56436	5.30233	6.05802	4.19195	4.29253	4.28032	4.10515	3.78647	3.05221	3.64814	3.90871	4.25098	3.87863	3.3906	4.04569	2.80103	2.45573	1.43113	1.5282	1.31836	1.28499	1.98106	1.90164	1.4958	2.33448	2.0298	2.39663	2.55174	1.03773	1.06806	0.411492	0.0472099	0.103218	3.5991	3.63034	3.42409
XS03G0218400.1	3.87862	2.52866	2.79082	2.12033	0.937811	1.80017	3.21012	2.88656	2.61156	1.10203	2.0544	3.88271	0.425762	0.685861	1.25198	2.13181	0.150879	1.07658	2.33842	0.133468	0	0.101695	0.71124	0.742063	0.294564	0.157342	0.238992	0.237726	0	0.356355	0.30699	0.528453	1.17121	1.03438	0.0556012	0	0	0	0	0	0	0.460596	0	0	0	0	2.95333	3.28638	1.42958
XS03G0218500.1	2.43019	2.79714	3.55125	3.40799	0.476162	1.76801	4.57608	3.89211	3.19792	3.17342	3.99872	5.93943	0.406331	5.00326	2.97611	3.89567	1.27052	1.34227	1.51941	0.990637	6.57565	1.93933	0.553712	1.19099	0.550223	0.285551	0.0804952	2.7374	0.0513507	0.1275	0.147057	0	0.0625231	0.460887	0.235399	0.343454	0.448679	0.0771879	0.372564	0.160843	0.129991	1.2395	0.593551	3.76212	4.24645	0.0491929	2.07583	2.39771	0.617572
XS02G0203200.1	0.270242	2.82579	2.66553	2.93706	3.61525	3.04732	3.98612	0	0.228025	0.139326	0.146194	0.83695	2.83571	2.08554	0.142189	0.291809	0.0839428	0.297024	0.112988	0.206185	0.425121	0.614789	0.543953	0.18635	0.353784	0.139445	1.16539	1.03534	0.256853	0.518193	0.280677	0.655151	0.703775	0.670299	0.598997	0.455263	0.515064	0.428582	0.588308	0	0.214374	0.362169	0.531443	0.129311	0.267014	0.373684	0.306778	0.269967	0.397104
XS03G0329000.1	0.325093	0.0944592	0.169279	0.279345	1.49416	1.09307	0.120452	0	0	0	0	0.142698	1.60584	3.47426	0	0	0.0426373	0.164662	0.280837	0.0196359	0	0.0929064	0.141912	0.103337	0.0864569	0.0731247	2.78894	1.81357	0	0	0	0.00606358	0.0866757	0.0859667	0.2618	0	0.261892	0.0738423	0	0	0	0	0	0	0	0	0.111897	0.292718	0.323702
XS03G0170900.1	0.234561	3.23201	2.72786	3.35982	3.69434	3.47333	3.97688	0.103991	0.138684	0.0617731	0.13468	0.123629	2.87104	1.58097	0.193335	0.0528638	0.21651	0.0278249	0.0713133	0.0754339	0.0707455	0.148436	0.194936	0.051617	0.183412	0.158769	1.74332	1.9902	0.238199	0	0.0822461	0	0	0	0.0230356	0	0	0	0	0	0	0.284864	0	0	0	0	0.362646	0.0253412	0.0654437
XS09G0078300.1	0.0741274	0.382891	0.161777	0.206333	0.272819	0.177327	0.136784	0	0.0285813	0	0.0503486	0	0.918456	0.428351	0.591713	0.238284	0	0.140793	0	0	0	0	0.567477	0	0	0	0.0515885	0.2716	0	0	0	0	0	0	0	0	0	0	0	0	0	0	0	0	0	0	0	0.105626	0
XS03G0301200.1	5.36985	6.09881	5.71249	5.77756	5.92564	5.71668	6.01335	5.46273	5.78847	5.00532	5.63553	4.98166	5.59077	5.31774	4.40488	5.48097	2.72871	4.38172	4.19267	3.17471	3.60305	2.52171	4.21573	3.9153	3.1852	2.83878	3.98277	4.63628	1.88905	1.75378	2.35982	2.85826	2.87814	2.95939	1.64738	0.662743	1.12084	1.58042	1.33501	0.920234	2.30091	3.13098	0.359651	1.77009	1.52463	0.522345	5.08949	5.16114	4.98522
XS04G0262000.1	0.281112	4.56729	4.43866	4.88886	5.52712	4.86364	5.34762	0.566151	0.366404	0	0.56795	1.03951	5.13616	4.69449	1.59015	0.572167	4.6088	2.90614	3.79833	4.79601	0.170591	5.39095	2.49524	3.60047	5.07581	4.07175	4.95712	4.22768	3.24334	1.47244	0.330098	0	0.0770666	0	0	0.554132	0.0619123	0.234242	0.43336	3.81558	0.133301	0	2.49864	0	0	0.175219	0.305148	0.0140446	0.022744
XS11G0171700.1	1.23326	2.05693	1.56638	1.98893	1.74298	1.8671	1.37589	0.921192	0.83857	0.956765	0.680704	0.958722	3.36043	2.7604	2.88025	2.20101	0.0216134	1.07438	1.03697	0.0407986	0	0	1.623	0.855132	0.211041	0.0245632	1.4222	2.57064	0.173987	0.407354	1.79141	0.348899	0.294388	0.904176	1.75394	0.0223611	0.266335	1.35409	0.159784	0.0685508	1.38874	0.414712	0.285956	0.127581	0.0455153	0	0.27499	1.30129	0.543712
XS10G0140100.1	3.63367	5.52866	5.34072	5.4072	4.79507	5.03818	5.51046	4.94932	5.22305	4.50446	4.78852	5.09386	5.62571	5.45261	4.27235	4.75418	3.47124	3.96943	3.77045	3.44592	5.44547	2.73852	3.33285	2.91039	2.45714	1.83784	3.89735	4.37933	2.76978	3.44091	3.19312	0.992351	0.92723	1.87871	1.25442	1.07494	1.01041	1.85216	1.96313	3.60935	2.1473	1.58834	0.615554	0.429385	0.111127	0.188588	3.35572	3.38925	3.2198
XS14G0050800.1	3.12509	4.29872	3.87875	4.49052	4.43259	4.06171	4.34377	3.6601	4.15304	5.24695	5.91456	4.71323	2.89329	4.99405	5.36762	5.70473	1.84293	3.81693	3.77129	1.94269	5.38721	0.0528713	2.62319	3.52202	1.99061	0.417803	1.41686	2.93009	1.0455	1.85158	1.58034	2.9043	3.38876	3.89172	2.66653	2.18966	2.01793	3.1615	2.6082	2.66424	2.88323	3.43009	1.04588	0.0684154	0.057815	0	2.31773	1.97229	0.878158
[truncated: 26 more columns]
